# Supplementary material for: Sedimentary record from the Canada Basin, Arctic Ocean: implications for late to middle Pleistocene glacial history
Source: Copernicus journal article supplement (doi:10.5194/cp-2016-139), 2017-01-16
Supplement: Supplementary file [file cp-2016-139-RC1-supplement.pdf]

1 **Sedimentary record from the Canada Basin, Arctic Ocean:**  
2 **implications for late to middle Pleistocene glacial history**

3 Linsen Dong<sup>1,2</sup>, Yanguang Liu<sup>1,2</sup>, Xuefa Shi<sup>1,2,\*</sup>, Leonid Polyak<sup>3</sup>, Yuanhui Huang<sup>1,2</sup>, Xisheng Fang<sup>1</sup>,  
4 Jianxing Liu<sup>1,2</sup>, Jianjun Zou<sup>1,2</sup>, Kunshan Wang<sup>1,2</sup>, Fuqiang Sun<sup>1</sup>, Xuchen Wang<sup>4</sup>.

5 <sup>1</sup>Key Laboratory of Marine Sedimentology and Environmental Geology, First Institute of Oceanography, State  
6 Oceanic Administration, Qingdao 266061, China

7 <sup>2</sup>Laboratory for Marine Geology, Qingdao National Laboratory for Marine Science and Technology, Qingdao, 266  
8 061, China

9 <sup>3</sup>Byrd Polar and Climate Research Center, The Ohio State University, 43210, USA

10 <sup>4</sup>Key Laboratory of Marine Chemistry Theory and Technology, Ocean University of China, Qingdao 266100,  
11 China

12

13 \*Corresponding author. Tel./fax: +86 532 88967491

14 E-mail address: xfshi@fio.org.cn (X. Shi)

15

16 **Abstract:** Sediment core ARC4–BN05 collected from the Canada Basin, Arctic  
17 Ocean, covers the late to middle Quaternary (Marine Isotope Stages (MIS) 1–15, ca.  
18 0.5–0.6 Ma) as estimated by correlation to earlier proposed Arctic Ocean  
19 stratigraphies and AMS <sup>14</sup>C dating of the youngest sediments. Detailed examination  
20 of clay and bulk mineralogy along with grain size, content of Ca and Mn, and  
21 planktonic foraminiferal numbers in core ARC4–BN05 provides important new

22 information about sedimentary environments and provenance. We use increased  
23 contents of coarse debris as an indicator of glacier collapse events at the margins of  
24 the western Arctic Ocean, and identify the provenance of these events from  
25 mineralogical composition. Notably, peaks of dolomite debris, including large  
26 dropstones, track the Laurentide Ice Sheet (LIS) discharge events to the Arctic Ocean.  
27 Major LIS inputs occurred during the stratigraphic intervals estimated as MIS 3,  
28 intra-MIS 5 and 7 events, MIS 8, and MIS 10. Inputs from the East Siberian Ice Sheet  
29 (ESIS) are inferred from peaks of smectite, kaolinite, and chlorite associated with  
30 coarse sediment. Major ESIS sedimentary events occurred in the intervals estimated  
31 as MIS 4, MIS 6 and MIS 12. Differences in LIS vs. ESIS inputs can be explained by  
32 ice-sheet configurations at different sea levels, sediment delivery mechanisms  
33 (iceberg rafting, suspension plumes, and debris flows), and surface circulation. A  
34 long-term change in the pattern of sediment inputs, with an apparent step change near  
35 the estimated MIS 7/8 boundary (ca. 0.25 Ma), presumably indicates an overall  
36 glacial expansion at the western Arctic margins, especially in North America.

37 **Keywords:** Sediment core, Pleistocene, western Arctic Ocean, clay minerals, bulk  
38 minerals, sediment provenance, Laurentide Ice Sheet, East Siberian Ice Sheet

39

## 40 **1. Introduction**

41 The advances and decays of continental ice sheets play a significant role in the  
42 alteration of global climatic system, such as changing atmospheric circulations,  
43 creating large area albedo anomalies and regulating the global sea level fluctuations

44 ([Clark et al., 1990](#)). Reconstruction of the history of ice sheets is therefore important  
45 not only for a better understanding of feedbacks of the future climate change and its  
46 impact on regional climates, but also for getting insights into the mechanisms of  
47 abrupt climate change.

48 Studies of Pleistocene glaciations around the Arctic Ocean dealt mostly with the  
49 late Quaternary history of the Eurasian Ice Sheet during Marine Isotope Stages (MIS)  
50 1–6 ([e.g., Svendsen et al., 2004; Larsen et al., 2006](#)) or the Laurentide Ice Sheet (LIS)  
51 with a special attention to the Last Glacial Maximum (LGM) ([e.g. Dyke et al., 2002;](#)  
52 [England et al., 2009](#)). In addition to terrestrial data, studies of sediment cores from the  
53 Arctic Ocean are critical for comprehending the history of glacial advances and  
54 retreats ([e.g., Polyak et al., 2004; 2009; Spielhagen et al., 2004; Stein et al., 2012;](#)  
55 [Kaparulina et al., 2015](#)). However, the long-term history of circum-Arctic glaciations  
56 is still poorly understood, especially with respect to the western Arctic including the  
57 North America and East Siberia. While a major impact of the North American ice  
58 sheets on circulation and depositional environments in the Arctic Ocean is indicated  
59 by various marine and terrestrial data ([e.g., Phillips and Grantz, 2001; Stokes et al.,](#)  
60 [2005](#)), the East Siberian Ice Sheet (ESIS) remained largely hypothetical until recently.  
61 Some terrestrial and seafloor mapping data now provide evidence for the existence of  
62 considerable ice masses on the East Siberian margin ([Basilyan et al., 2010; Niessen et](#)  
63 [al., 2013; Dove et al., 2014](#)), but the timing and extent of these glaciations is virtually  
64 unknown. Marine sedimentary records from the Arctic Ocean adjacent to the East  
65 Siberian margin could add valuable information to this intriguing paleoglaciological

66 problem.

67 In this paper, we present a multiproxy study of glacial-interglacial changes  
68 during the late to middle Pleistocene based on sediment core ARC4-BN05 from the  
69 Canada Basin north of the Chukchi Plateau and east of the Mendeleev Ridge. This  
70 location can be affected by the two main Arctic Ocean circulation systems, the  
71 Beaufort Gyre and the Transpolar Drift, which carry sea ice, icebergs, and sediment  
72 discharge from the North America and Siberia, respectively. As this circulation along  
73 with sedimentary environments and sources varied greatly during the Pleistocene  
74 climate cycles, resulting variations in sediment delivery and deposition make for a  
75 valuable paleoclimatic record for the western Arctic. Biogenic proxies (such as  
76 foraminifers) have uneven and overall limited distribution in Arctic Ocean sediments,  
77 while the terrigenous component provides a more consistent material for  
78 paleoceanographic studies (e.g. [Stein, 2008](#); [Polyak et al., 2009](#)). As sediments in the  
79 Arctic Ocean are primarily transported by sea ice and/or icebergs during glacial  
80 events, sediment composition yields important information not only on the  
81 provenance and transport pathways, but also on the attendant glacial and  
82 paleoclimatic history (e.g. [Spielhagen et al., 1997](#); [Vogt et al., 2001](#); [Knies et al.,](#)  
83 [2001](#)). By using clay and bulk mineralogy, along with grain size and the content of  
84 major elements **Ca** and Mn, we reconstruct depositional environments and sediment  
85 provenance to provide clues to the history of western Arctic ice sheets and their  
86 interaction with the Arctic Ocean.

87

## 88 2. Regional background

89 The Arctic Ocean is surrounded by land masses composed of an assortment of  
90 lithologies and situated in a variety of climatic, tectonic, and physiographic settings.  
91 [Figure 1](#) depicts a schematic geological map showing the main terrains and associated  
92 lithologies ([Fagel et al., 2014](#)). The West Siberian Basin, East Siberian platform and  
93 Verkhoyansk-Chukotka provinces of the Eurasian continent are mainly composed of  
94 terrigenous sediment ([Fagel et al., 2014](#)). The Siberian (Putorana) traps constitute one  
95 of the largest flood basalts in the world ([Sharma et al., 1992](#)). The western  
96 Okhotsk-Chukotsk volcanic belt contains acidic to intermediate rocks, whereas  
97 intermediate to basic rocks are more characteristic of the eastern side ([Viscosi-Shirley](#)  
98 [et al., 2003](#)). The Kara Plate and the Taymyr foldbelt, as well as the Ural and Novaya  
99 Zemlya foldbelt are mainly composed of intrusive and metamorphic rocks ([Fagel et](#)  
100 [al., 2014](#) ).

101 The geology of outcropping terrains of Alaska mainly includes  
102 Canadian-Alaskan Cordillera, Brooks Range, and part of the Northern-American  
103 platform containing mostly intrusive, metamorphic, and some clastic rocks ([Fagel et](#)  
104 [al., 2014](#)). The outcrops of the Canadian Arctic Archipelago are mainly composed of  
105 carbonate and clastic rocks ([Phillips and Grantz, 2001](#); [Fagel et al., 2014](#)), whereas  
106 intrusive and clastic rocks are mostly characteristic for Greenland ([Fagel et al., 2014](#)).

107 Dissolved and suspended matter is transported to the Arctic Ocean by  
108 voluminous rivers, with the Lena and Mackenzie Rivers being the largest on the  
109 Siberian and North American side, respectively. The transported material is further

110 distributed across the Arctic Ocean in water and/or ice by currents. The two main  
111 surface, wind-driven circulation systems are the clockwise Beaufort Gyre (BG) in the  
112 western Arctic and the Transpolar Drift (TPD) that carries water and ice from the  
113 Siberian margin to the Norwegian-Greenland Sea (e.g., [Rudels, 2009](#)). The strength  
114 and trajectories of these current systems may vary depending on changes in  
115 atmospheric pressure fields known as the Arctic Oscillation ([Rigor et al., 2002](#)).

116 Sedimentation in the Arctic Ocean is strongly controlled by sea ice that acts as  
117 sediment carrier, but can also suppress sediment deposition under thick and persistent  
118 ice cover ([Darby et al., 2006](#); [Polyak et al., 2009](#)). During glacial/deglacial events,  
119 multiple icebergs discharged into the Arctic Ocean from the termini of marine-based  
120 ice sheets and strongly affected sediment dispersal and deposition (e.g., [Spielhagen et](#)  
121 [al., 2004](#); [Polyak et al., 2009](#)). Fine-grained sediments can also be transported by  
122 subsurface and deep-water currents, such as the Atlantic water ([Winkler et al., 2002](#)),  
123 but their role in the overall Arctic Ocean sedimentation is not well understood.

124

### 125 **3. Materials and methods**

126 Gravity core ARC4-BN05 (referred hereafter as BN05) was collected from the  
127 Canada Basin in the vicinity of the Mendeleev Ridge (80° 29.04' N, 161° 27.90'  
128 W, 3156 m water depth) ([Fig. 1](#)) on the fourth Chinese National Arctic Research  
129 Expedition (CHINARE-IV) in 2009. The BN05 site was chosen in a close proximity  
130 to earlier investigated cores FL224 and PS72/392-5 ([Stein et al., 2010a](#)) to enable  
131 robust correlation with the established stratigraphies. A total of 119 samples were

132 taken at 2-cm intervals over the 238-cm BN05 length, and kept frozen until analyzed.

133 For age constraint within the radiocarbon range, Accelerator Mass  
134 Spectrometry  $^{14}\text{C}$  dating was performed on 1000–1200 tests of planktic foraminifers  
135 *Neogloboquadrina pachyderma* sin. ( $>63\ \mu\text{m}$ ) from core depths at 4-6, 8-10, 18-20  
136 and 22-24 cm, using the NOSAMS facilities at Woods Hole Oceanographic  
137 Institution.

138 For grain-size analysis, ~2-g sediment samples were successively treated with  
139 15 ml 15%  $\text{H}_2\text{O}_2$ , 5 ml 3mol/L HCl, and 20 ml 1mol/L  $\text{Na}_2\text{CO}_3$  for removing organic  
140 matter, biogenic carbonates, and biogenic silica, respectively. Grain size  
141 measurements in the range of 0.02 to 2000  $\mu\text{m}$  were performed on a Malvern  
142 Mastersize laser particle sizer (Mastersizer 2000) in the First Institute of  
143 Oceanography, SOA, China.

144 Coarse sediment  $>63\ \mu\text{m}$  was sieved from ~10–15 g samples and counted under  
145 the microscope for foraminiferal and mineral grain numbers.

146 Elemental abundances, given in peak area (counts per second, cps), were  
147 obtained at 1 cm resolution using the Itrax XRF core scanner at the Polar Research  
148 Institute of China, setting at 20 s count times, 10 kV X-ray voltage and an X-ray  
149 current of 20 mA. The obtained count values are used as estimates of relative  
150 concentrations. In addition, concentrations of major elements, such as Ca and Mn,  
151 were determined on point samples by ICP-OES (iCAP6300) at the First Institute of  
152 Oceanography, SOA, China, following the standard procedures.

153 Color reflectance was measured using a hand-held Minolta CM-2002

154 spectrophotometer at 1 cm intervals. Only the grayscale lightness index ( $L^*$ ) is used in  
155 this paper.

156 A total of 60 2-cm-thick samples were collected at 4-cm interval for  
157 paleomagnetic measurements performed at the Paleomagnetism and Geochronology  
158 Laboratory of the Institute of Geology and Geophysics, Chinese Academy of Science.  
159 Magnetic susceptibility was measured using the KLY-4s Kappabridge instrument.  
160 Subsequently, stepwise alternating field (AF) demagnetization of natural remanent  
161 magnetization (NRM) was conducted using the 2-G Enterprises Model 760-R  
162 cryogenic magnetometer (2G760) installed in a magnetically shielded ( $<300$  nT)  
163 space. AF demagnetization steps of 5-10 mT were used up to a maximum AF of 100  
164 mT.

165 For bulk sediment mineralogy ~5-g samples were dried, pulverized, passed  
166 through a 200 mesh sieve, and loaded into aluminum holders. Samples were X-rayed  
167 from 5 to  $65^\circ 2\theta$  with Cu K-alpha radiation (40 kV, 100 mA) using a step size of  
168  $0.02^\circ 2\theta$  and a counting time of 2 s per step on a D/max-2500 diffractometer (XRD)  
169 equipped with a graphite monochromator with  $1^\circ$  slits in the laboratory of the First  
170 Institute of Oceanography, SOA, China. Prior to the analysis, instrument was blank  
171 corrected and all samples were measured under the same conditions. Peak areas were  
172 estimated from XRD traces using Jade6.0 software, and semi-quantitative estimates of  
173 bulk mineral percentages were calculated following Cook (1975). The windows ( $2\theta$ ),  
174 range of spacings ( $A$ ) and intensity factors of minerals were determined based on  
175 Cook (1975) are listed in Table 1.



176 Samples for clay minerals determination (~5g) were first treated with H<sub>2</sub>O<sub>2</sub> (10%)  
177 and HCl (1mol /L) to oxidize the organic matter and remove ~~the~~ carbonates,  
178 respectively. Clay fractions (< 2 μm) were obtained by the Atterberg settling tubes  
179 method according to Stoke's Law. Each sample was transferred to two slides by wet  
180 smearing. Samples were then air-dried prior to XRD analysis. One sample slide was  
181 air dried at 60 °C for 2 h and analyzed. The second sample was solvated with ethylene  
182 glycol in an underpressured desiccator for at least 24 h at 60 °C. Every  
183 ethylene-glycol solvated sample was measured twice: the first scanning was done  
184 from 3° to 30° 2θ with a step size of 0.02°, and the second scanning from 24° to 26°  
185 2θ with a 0.01° step. The latter was run as a slow scan to distinguish the 3.54/3.58 Å  
186 kaolinite/chlorite double peak. Clay minerals were also identified by X-ray diffraction  
187 (XRD) using a D/max-2500 diffractometer with CuKα radiation (40 kV and 100 mA)  
188 in the laboratory of the First Institute of Oceanography, SOA, China. Peak areas  
189 representing the clay mineral groups were estimated from glycolated XRD traces  
190 using the 17 Å smectite, 10 Å illite, and 7 Å chlorite plus kaolinite peaks. Chlorite  
191 (004) was identified at 3.54Å and kaolinite (002) at 3.58Å (Biscaye, 1964),  
192 respectively. Semi-quantitative estimates of clay mineral percentages were calculated  
193 by means of Biscaye's factors (1965).

194 To enhance the interpretation of downcore proxy distributions, Principal  
195 Component Analysis (PCA) was performed in MATLAB [MathWorks, 2014]. PCA  
196 included all analyzed mineralogical proxies along with main grain-size groups (clay,  
197 silt, fine to medium sand (63-250μm), and coarser grains), Ca and Mn concentrations

198 (ICP-OES), and foraminiferal numbers.

199

## 200 **4. Results**

### 201 **4.1 General stratigraphy**

202 As common for sediment cores from the Arctic Ocean (e.g., [Jakobsson et al.,](#)  
203 [2000; Polyak et al., 2004, 2009; Spielhagen et al., 2004; Stein et al., 2010a, b](#)), core  
204 ARC4-BN05 displays distinct cycles in sediment color and composition expressed in  
205 interlamination of dark brownish and lighter-colored grayish muds (silty clays, clay  
206 silts and sandy silt), with coarser dropstones occurring in several layers. This color  
207 cyclicity is approximated by changes in sediment lightness that largely mirrors the  
208 content of Mn ([Fig. 3](#)), consistent with other studies from the Arctic Ocean (e.g.,  
209 [Jakobsson et al., 2000; Polyak et al., 2004; Adler et al., 2009](#)). We identify 18  
210 distinctly brown units, from B1 to B18, characterized by elevated content of Mn ([Fig.](#)  
211 [3](#)). Another prominent lithostratigraphic feature in the western Arctic Ocean, widely  
212 used for core correlation, is pink-white to whitish layers (PW) rich in detrital  
213 carbonates (e.g., [Clark et al., 1980; Polyak et al., 2009; Stein et al., 2010a, b](#)). We  
214 identify three major PW layers expressed both visually and in high Ca content ([Fig.](#)  
215 [3](#)).

216 Foraminiferal abundances are generally high (mostly >50% of >63 $\mu$ m grains) in  
217 brown units, except for B11-B13 and below B17-B18, and are very low to absent in  
218 grey units. This pattern is consistent with foraminiferal stratigraphy reported in earlier

219 studies from the western Arctic Ocean (e.g., cores NP-26, HLY0503-JPC6 & 8,  
220 P1-92AR-P23 & 39: Polyak et al., 2004, 2013; Adler et al., 2009; Cronin et al., 2013;  
221 Lazar and Polyak, 2016).

222

## 223 4.2 AMS <sup>14</sup>C dating

224 The measured AMS <sup>14</sup>C ages of core ARC4-BN05 were calibrated to calendar  
225 ages based on calibration using CALIB 7.10 (<http://calib.org/calib/calib.html>) (Table  
226 2). The reservoir corrections of 790 and 1400 years were applied to Holocene and  
227 glacial-age samples, respectively, according to Coulthard et al. (2010) and Hanslik et  
228 al. (2010). Same corrections have also been applied to <sup>14</sup>C ages in core 03M03 from  
229 the Chukchi Abyssal Plain (Fig. 2; Wang et al., 2013).

230

## 231 4.3 Paleomagnetic stratigraphy

232 While detailed paleomagnetic investigation is not an objective of this paper, we  
233 utilize the inclination data for an independent stratigraphic constraint in line with  
234 earlier studies (e.g., Jakobsson et al., 2000; Spielhagen et al., 2004; Polyak et al.,  
235 2009). Paleomagnetic inclination in core ARC4-BN05 shows mostly positive values  
236 oscillating around +70° in the upper part of the core, with a major polarity change  
237 occurring at ~120 cm (Fig.3). A similar inclination drop has been identified in  
238 multiple sediment cores across the Arctic Ocean in the same stratigraphic position  
239 within estimated MIS 7, although the nature of this change in paleomagnetic

240 characteristics is not well understood (e.g., Jakobsson et al., 2000; Polyak et al., 2009;  
241 Xuan and Channell, 2010).

242 Other paleomagnetic parameters, such as magnetic susceptibility (MS), can  
243 provide additional correlation means (e.g., Sellén et al., 2010). Two prominent peaks  
244 in MS occur in the intervals between units B7/B8 and B10/ B11 (Fig. 3).

245

#### 246 4.4 Grain size and dropstones

247 Based on the results of grain-size analysis, sediment in core BN05 can be  
248 generally classified as sandy mud, poorly to very poorly sorted, mostly coarse-skewed,  
249 and strongly leptokurtic (peaked). Generally, silt and clay predominate grain-size  
250 composition (33-60% and 23-61%, respectively), but coarser particles also make a  
251 considerable contribution, with up to >30% peak contents of sand (>63 $\mu$ m) (Fig. 4a).  
252 Coarse size fractions, from coarse silt to various sand fractions (e.g., >63, >125,  
253 and >250  $\mu$ m) mostly co-vary downcore.

254 Grain size distribution is mostly polymodal with three distinct major modes  
255 centered at ~4, 7-7.5, and 85-90  $\mu$ m, plus a smaller but consistent mode at ~400-450  
256  $\mu$ m (Fig. 4b), which can be approximated by clay (<4  $\mu$ m), silt, and sand size  
257 fractions. Mode 1 (4- $\mu$ m) is overall most common in core BN05, occurring mostly in  
258 combination with the fine- and/or coarse-sand mode, but also forming very  
259 fine-grained intervals (e.g., at 37 cm, Fig. 4b). Mode 2 (7-7.5  $\mu$ m) is common in the  
260 lower part of the core (below ~175 cm), where it mostly co-occurs with mode 1 and

261 coarse-grain tail, and also in distinct grey units around 30-40 and 90-100 cm in  
262 combination with the fine-sand mode 3 (e.g., 39 and 93 cm, Fig. 4b).

263 Several core intervals contain large rock fragments >5 mm (dropstones). These  
264 rock fragments are mostly poorly rounded, subangular to angular in shape.

265 Composition of sampled dropstones is illustrated in Fig. 4c. Most dropstones are  
266 represented by dolomite and low metamorphic quartz sandstone fragments of up to 5  
267 cm in diameter. Also found were individual dropstones composed of volcanic rock  
268 and shale, as well as a few greisen dropstones near the base of the core.

269

#### 270 **4.5 Sediment mineralogy**

271 The clay assemblage in samples from core ARC4-BN05 mainly consists of illite,  
272 chlorite, kaolinite and smectite (Fig. 5). The illite group is overall the major  
273 constituent of the clay mineral fraction, ranging between 43% and 73%. Its downcore  
274 distribution pattern is opposite to that of the three other major clay-mineral groups -  
275 kaolinite, chlorite, and smectite, which mostly co-vary except for some  
276 lithostratigraphic intervals, such as PW layers. Elevated content of these clay minerals  
277 is characteristic for grayish sedimentary units.

278 The bulk mineral assemblage in core ARC4-BN05 mainly consists of quartz,  
279 K-feldspar, plagioclase, calcite, dolomite and pyroxene (Fig. 5). Quartz is generally  
280 the most abundant mineral ranging between 20% and 51% and typically peaking in  
281 grayish sediment units. K-feldspar, plagioclase and pyroxene (mainly augitic) mostly

282 co-vary, with peaks in grey units in the upper part of the core, but more in brown units  
283 in the lower part starting from unit B10. Calcite has a high content in brown units of  
284 the upper part and much lower values below unit B9. Dolomite distribution shows  
285 distinct peaks reaching up to 53%, with the highest peaks occurring in the PW layers.  
286 Similar to other minerals, the pattern of dolomite distribution changes around unit  
287 B10, with maxima in thick grey units below and in thin interlayers within brown units  
288 above this stratigraphic level.

289

#### 290 **4.6 Principal Component Analysis**

291 The first three Principal Components identified by PCA with a Varimax rotation  
292 account for 19%, 18%, and 17% of the total variance. This relatively low and evenly  
293 distributed communality of the leading PCs reflects a complexity of multi-proxy  
294 variables characterizing sedimentary environments and provenance, and their strong  
295 variability occurring over multiple climatic cycles. Despite this variability, the PCs  
296 identify several robust variable groups as shown in the PC loading score plots (Fig. 6).  
297 Most of the groupings are well reproduced in PC1-2 and PC2-3 plots, with just a few  
298 differences, such as a configuration of coarse grain-size fractions (high PC1 loading  
299 score for silt vs. high PC3 score for fine sand).

300

### 301 **5. Discussion**

#### 302 **5.1 Stratigraphic framework**

303 As no single existing chronostratigraphic method can comprehensively constrain

304 the age of the Arctic Ocean Pleistocene sediments, the age model for core  
305 ARC4-BN05 was developed by correlating multiple proxies (such as paleomagnetic,  
306 foraminiferal, and lithological) to earlier established Arctic Ocean stratigraphies (e.g.,  
307 [Adler et al., 2009](#); [Polyak et al., 2009, 2013](#); [Stein et al., 2010a](#)), combined with  $^{14}\text{C}$   
308 ages in the youngest part of the record (e.g., [Fig. 7](#)).

309 The two  $^{14}\text{C}$  dates from the uppermost, 10-cm-thick brown sedimentary unit (B1)  
310 in core ARC4-BN05 clearly identify its Holocene age ([Table 2](#); [Fig. 3](#)). Compilations  
311 of  $^{14}\text{C}$  ages from the surficial and downcore sediments in the western Arctic Ocean  
312 ([Polyak et al., 2009](#); [Xiao et al., 2014](#)) indicate that the age of this unit extends from  
313 ~2-3 ka on top to ~10-11 ka at the bottom contact, although an accurate estimate is  
314 impeded by the uncertainties with the reservoir ages.

315 Two  $^{14}\text{C}$  dates of ca. 42-44 ka from the brown unit B2 ([Table 2](#); [Fig. 3](#))  
316 apparently fall into MIS 3, consistent with earlier stratigraphic results (e.g., [Polyak et](#)  
317 [al., 2004, 2009](#); [Adler et al., 2009](#); [Stein et al., 2010a](#)). These ages should be, however,  
318 considered as crude estimates as they are close to the  $^{14}\text{C}$  dating limit, and the age  
319 distribution in B2 has common inversions (e.g., [Polyak et al., 2009](#)). In cores with  
320 relatively elevated sedimentation rates this unit occurs as two distinct brown layers,  
321 indicated in some papers as B2a and B2b (e.g., [Stein et al., 2010a, b](#); [Wang et al.,](#)  
322 [2013](#)). In core ARC4-BN05 this partitioning is less apparent due to low sedimentation  
323 rates, but the brownish sediment on top of the coarse detrital carbonate peak PW/W3,  
324 typically located between B2a and B2b, probably corresponds to B2a.

325 An abrupt increase in sediment age between closely spaced B1 and B2 in core

326 ARC4-BN05 suggests a very condensed section or a hiatus between MIS 1 and MIS 3.  
327 This age distribution is common for the western Arctic Ocean, and has been attributed  
328 to very low to no sedimentation due to a very solid sea-ice cover or an ice shelf during  
329 the Last Glacial Maximum in MIS 2 (e.g. Polyak et al., 2009; Wang et al., 2013).

330 Below the range of  $^{14}\text{C}$  ages the age model is based entirely on proxy  
331 correlations with earlier developed Arctic Ocean stratigraphies (e.g., Fig. 7). This  
332 correlation is enabled by the cyclic nature of sediment lithology and attendant proxies,  
333 where brown and grayish units generally correspond to interglacial (or major  
334 interstadial) and glacial climatic intervals, respectively (e.g., Jakobsson et al., 2000;  
335 Polyak et al., 2004, 2009; Adler et al., 2009; Stein et al., 2010a, b). In addition,  
336 correlation tie points are provided by rare or unique events, such as prominent detrital  
337 carbonate peaks (PW/W), major paleomagnetic inclination swings, and changes in  
338 foraminiferal assemblages and abundance pattern.

339 According to this approach, we identify foraminiferal- and Mn-rich brown units  
340 B3-B7 and B8-B10 as warm substages of MIS 5 and 7, respectively (Figs. 3, 7). This  
341 age assignment is corroborated by the prominent detrital carbonate peaks PW2 and 1  
342 near the bottom of MIS 5 and 7, respectively. Furthermore, the principal drop in  
343 paleomagnetic inclination in core ARC4-BN05 occurs in the lower part of MIS 7,  
344 consistent with many cores from the Arctic Ocean (e.g., Jakobsson et al., 2000;  
345 Spielhagen et al., 2004; Adler et al., 2009; Polyak et al., 2009). Solidly grayish,  
346 foraminiferal and Mn-poor unit separating brown units B2 and B3 is accordingly  
347 considered as related to glacial MIS 4, and a similar unit between B7 and B8 – to MIS



348 6. It is possible, however, that most of the fine-grained, greyish sediment was  
349 deposited during deglaciations following the actual glacial intervals, which may have  
350 been very compressed, similar to the LGM.

351 Stratigraphy below MIS 7 has been less investigated in prior studies, and  
352 therefore the age model for the lower part of the core is more tentative. Nevertheless,  
353 a prominent oldest foraminiferal peak in units B14-B16 (Fig. 3) allows us to identify  
354 these units as MIS 11 by comparison with other microfaunal records reported from  
355 the western Arctic Ocean (e.g., Cronin et al., 2013; Polyak et al., 2013). MIS 13 and  
356 15 have been tentatively assigned to Units B17 and B18 underlying a prominent grey  
357 interval attributed to MIS 12. Overall, the record in core ARC4-BN05 is estimated to  
358 represent the last ca. 0.5-0.6 Ma, that is, most of the middle to late Quaternary with an  
359 average sedimentation rates of 4-5 mm/ka.

360

## 361 **5.2 Depositional environments and sediment provenance**

362 Distribution of various terrigenous components in Arctic sediment records  
363 carries information on sediment sources and depositional environments, and thus  
364 paleocirculation and changes in paleoclimatic conditions, such as connection to other  
365 oceans and build-up/disintegration of ice sheets (e.g., Bischof and Darby, 1997;  
366 Krylov et al., 2008; Polyak et al., 2009; Stein et al., 2010a, b; Yurco et al., 2010;  
367 Fagel et al., 2014). We utilize the data on clay and bulk minerals along with the grain  
368 size and total Ca and Mn distribution in core ARC4-BN05 to reconstruct changes in

369 glacial conditions and circulation in the western Arctic Ocean during several glacial  
370 cycles extending to estimated ca. 0.5-0.6 Ma. In this work we capitalize on earlier  
371 studies on the distribution of bulk and/or clay minerals in surface and downcore  
372 Arctic Ocean sediments (e.g., Vogt, 1997; Stein, 2008; Krylov et al., 2014; Zou,  
373 2016), corroborated by more targeted provenance proxies, such as radiogenic isotopes  
374 (Bazhenova, 2012; Fagel et al., 2014), heavy minerals (Stein, 2008; Kaparulina et al.,  
375 2015), composition of coarse debris (Bischof et al., 1996; Wang et al., 2013), and  
376 iron-oxide grains (e.g., Bischof and Darby, 1997; Darby et al., 2002).

377

### 378 **5.2.1 Grain size and depositional processes**

379 A variable, mostly multimodal distribution of grain size in core BN05 indicates  
380 multiple controls on sediment delivery and/or deposition. The prevailing mode 1 at ~4  
381  $\mu\text{m}$ , often in variable combinations with the fine-sand mode, is common for brown  
382 units, except for the oldest layers (estimated MIS 13/15 and partly 11). This pattern is  
383 similar to grain-size distribution with an average mode at ~3.4  $\mu\text{m}$  reported for  
384 Holocene sediments across the Arctic Ocean (Darby et al., 2009). Furthermore,  
385 sediment in core BN05 with the same mode also makes up the most fine-grained  
386 intervals in glacial/deglacial units, such as MIS 4 and 6 (Fig. 4b). We infer that mode  
387 1 represents some combination of deposition from sea ice and from suspension that  
388 could result from winnowing of fines from the basin margins and ridges during  
389 interglacials, as well as overflow plumes discharged by retreating glaciers during

390 glacial/deglacial intervals. An occurrence of apparently similar grain-size pattern in  
391 interglacial and fine-grained glacial/deglacial intervals might indicate a convergence  
392 of glacial erosion processes with those related to sea-ice formation and transportation.  
393 A similar grain-size interpretation has been earlier proposed for sediment from the  
394 Canada Basin with the principal mode at  $\sim 2 \mu\text{m}$  (Clark et al., 1980). This apparent  
395 discrepancy may be related to the methodological offset between grain size  
396 determined by the pipette method vs. laser diffraction, where the latter produces larger  
397 diameters for fine sediment, especially in the presence of platy particles (Beuselinck  
398 et al., 1998; Ramaswamy and Rao, 2006).

399 Mode 2 centered at 7-7.5  $\mu\text{m}$  is more stratigraphically restricted. Its combination  
400 with the fine-sand mode (e.g., Fig. 4b) is characteristic for coarser grained portions of  
401 MIS 4, 6, and 12, which also have a specific mineralogical composition (PC loading  
402 group 4: Fig. 6; Table 3). This distinct stratigraphic pattern suggests that the  
403 formation of this sediment was related to glacial/deglacial processes; however, the  
404 prevailing grain size mode around 7-7.5  $\mu\text{m}$  is too coarse for suspension plumes and  
405 too fine for massive deposition from icebergs. On the other hand, fine to medium silts,  
406 susceptible to intermediate currents, are common for turbiditic deposits, including  
407 glacial environments (e.g., Wang and Hesse, 1996; Hesse and Khodabaksh, 2016).  
408 We propose that mode 2 sediment type is related to glacial underflows that formed  
409 debris lobes on glaciated margins grading into turbidites in the adjacent basins, along  
410 with iceberg-rafted debris. Multiple debris lobes have been mapped on the Chukchi  
411 and East-Siberian slopes in association with glacial diamictites on the margin

412 (Jakobsson et al., 2008; Niessen et al., 2013; Dove et al., 2014). Close to the margins  
413 glacioturbidites can form deposits of several meters thick (Polyak et al., 2007), but  
414 thin out towards the inner parts of the basins, such as the BN05 site. In particular,  
415 deposits similar to fine-grained turbidites, attributed to MIS 4/lower MIS 3, have been  
416 recovered from the Northwind and Chukchi basins affected by glacial inputs from  
417 the Chukchi and East Siberian margins, respectively (Polyak et al., 2007; Matthiessen  
418 et al., 2010; Wang et al., 2013). In the Chukchi Basin this unit, correlative to a much  
419 thinner MIS 4 interval in core BN05, is characterized by a high content of fine silt  
420 with a peaky downcore distribution (Wang et al., 2010, 2013).

421       Additionally, modes 1 and 2 make up a bimodal distribution in the lowermost  
422 part of the core – mostly in estimated MIS 13/15 and near the bottom of MIS 11. The  
423 predominant stratigraphic position in brown units makes unlikely the glacial origin  
424 of this sediment. We hypothesize that this grain-size pattern reflects a combination of  
425 “normal” interglacial environments with winnowed silts deposited by downwelling of  
426 shelf waters enriched in dense brines. Although no observational evidence exists for  
427 such waters penetrating deeper than the halocline (~200 m) under modern Arctic  
428 conditions, periods of stronger cascading in the past have been inferred from sediment  
429 distribution on the slopes (Darby et al., 2009) and some sedimentary proxies, such as  
430 radiogenic isotopes (Haley and Polyak, 2013; Jang et al., 2013). The bimodal  
431 distribution of fine sediment in the lower part of the record is accompanied in most  
432 samples by a small but consistent coarse-sand mode (400-450  $\mu\text{m}$ ), likely indicating  
433 the presence of iceberg rafting.

434 Coarse sediment, up to dropstones of several cm large, is a consistent feature in  
435 core BN05. In the apparent absence of strong current control on sedimentation, except  
436 for some shelf areas, and a pervasive presence of floating ice, coarse sediment in the  
437 Arctic Ocean is typically attributed to ice rafting, including sea ice and icebergs (e.g.,  
438 [Stein, 2008](#); [Polyak et al., 2010](#), and references therein). Sedimentological studies in  
439 areas of sea-ice formation or melting and in ice itself indicate that sediment carried by  
440 sea ice in the Arctic Ocean is predominated by silt and clay, while coarser fractions  
441 are of minor importance ([Clark and Hanson, 1983](#); [Nürnberg et al., 1994](#); [Hebbeln,](#)  
442 [2000](#); [Darby, 2003](#); [Dethleff, 2005](#); [Darby et al., 2009](#)). Some studies suggest a higher  
443 content of sand in ice formed at the sea floor (anchor ice) ([Darby et al., 2011](#)), but the  
444 contribution of this source yet needs to be evaluated. Furthermore, the role of sea ice  
445 on sedimentation in the Arctic Ocean is not clear for glacial intervals, when most of  
446 the sediment entrainment areas were exposed or covered by ice sheets. In contrast, in  
447 iceberg-rafted sediment, deposited mostly in glacial/deglacial environments, the  
448 content of large size fractions, from sand to boulders, is typically high, in excess of  
449 10-20% ([Clark and Hanson, 1983](#); [Dowdeswell et al., 1994](#); [Andrews, 2000](#)). Thus,  
450 elevated content of coarse sediment can be regarded as a good indicator of intense  
451 iceberg rafting. Such events are not probable during full interglacials, exemplified by  
452 modern conditions, but most likely occurred at times of instability and disintegration  
453 of ice sheets that extended to the Arctic Ocean in the past (e.g., [Spielhagen et al.,](#)  
454 [2004](#); [Stokes et al., 2005](#); [Polyak et al., 2009](#)).

455 In core BN05, coarse fractions (from coarse silt to sand) measured at different

456 sizes show very similar distribution patterns (Fig. 4a), indicating the same  
457 predominant delivery mechanism, that is, iceberg rafting. This pattern is reflected in a  
458 good correlation of fine to medium sand (63-250  $\mu\text{m}$ ) with coarser,  $>250\mu\text{m}$  fractions,  
459 that defines one of the PC loading groups (Fig. 6, Table 3). Increased coarse-grain  
460 content mostly characterizes grayish units, especially near gray-to-brown sediment  
461 transitions, and the PW layers, but also occurs in brown units in the upper part of the  
462 record. The latter peaks enriched in detrital carbonates (high dolomite and total Ca)  
463 represent interstadial or incomplete interglacial conditions, such as MIS 3, MIS 5a,  
464 and parts of MIS 7.

465 A common occurrence (separate or combined) of two coarse grain modes,  
466 around 85-90 and 400-450  $\mu\text{m}$ , may indicate different sources for iceberg-rafted  
467 material or different thresholds for glacial disintegration of various rock types. While  
468 a more thorough interpretation requires further research, we note that grain-size mode  
469 1 may co-occur with both fine-and coarse-sand modes, mode 2 – only with the  
470 fine-sand mode, and bimodal 1/2 sediment type – only with the coarse-sand one.  
471

### 472 **5.2.2 North American provenance**

473 One of the most robust PC loading groups is distinctly characterized by high  
474 loadings of dolomite, total Ca content, and quartz/feldspar index (Group 2: Fig. 6,  
475 Table 3). Dolomite is known as a robust indicator of the North American provenance  
476 in the western Arctic, especially in relation to glacial inputs (e.g., Vogt, 1997; Zou,

477 2016). Dolomite is the main contributor of total Ca in sediment cores from the  
478 western Arctic Ocean, with an especially high content in multiple coarse-grain peaks  
479 (Bischof et al., 1996; Phillips and Grantz, 2001; Polyak et al., 2009; Stein et al., 2010a,  
480 b). This dolomite is related to the extensive, carbonate-rich Paleozoic terrane in the  
481 northern Canada (North American Platform; Fig. 1) that has been repeatedly eroded  
482 during the Pleistocene by the LIS. The distribution of dolomite in Arctic sediment  
483 cores can thus be used for reconstructing the history of the LIS sedimentary inputs.

484 Consistent with dolomite distribution in many other cores from the western  
485 Arctic Ocean, its overall high content in core ARC4-BN05 has major peaks  
486 corresponding to visually identifiable PW/W layers enriched in coarse debris (Fig. 5).  
487 As has been suggested in earlier studies (e.g., Stokes et al., 2005; Polyak et al., 2009),  
488 we infer that the dolomite peaks are related to pulses of massive iceberg discharge  
489 from the LIS during the periods of its destabilization and disintegration. Furthermore,  
490 radiogenic isotope studies demonstrate that fine sediment in the dolomitic peaks also  
491 has North American provenance (Bazhenova, 2012; Fagel et al., 2014). These results  
492 indicate that dolomite may have been transported not only by icebergs, but also in  
493 meltwater plumes coming during deglaciations from the Canadian Archipelago or the  
494 Mackenzie River.

495 As noted above, a change in the stratigraphic pattern of dolomite distribution  
496 occurs around unit B10 estimated to correspond to the lower part of MIS 7 (Fig. 5). In  
497 older sediments dolomite maxima co-occur with glacial (predominantly gray)  
498 intervals, whereas, in the younger stratigraphy dolomite peaks in brown sediment or

499 grayish interlayers within brown units (MIS 3, 5, and 7), presumably corresponding to  
500 transitional paleoclimatic environments, such as interstadials or stadials within  
501 complex interglacial stages.

502 Another mineral indicator related to the North American provenance is a  
503 quartz/feldspar ratio due to a considerable presence of sedimentary rocks enriched in  
504 quartz, but not feldspar, in the Canadian Arctic in comparison with the Siberian  
505 margin (e.g., [Vogt, 1997](#); [Zou, 2016](#); [Kobayashi et al., 2016](#)). In core ARC4-BN05  
506 the distribution of this index is generally similar to dolomite, except for some peak  
507 intervals, notably low Qz/Fsp values in PW1 and 3 ([Fig. 6](#)).

508

### 509 **5.2.3 Siberian provenance**

510 Mineral proxies potentially linked to Siberian provenance make two distinct  
511 groups, as reflected in the PCA results (Groups 3 and 4: [Fig. 6](#), [Table 3](#)). Group 3  
512 comprises primarily pyroxene, feldspar, and plagioclase, and strongly anticorrelates  
513 with the North-American proxies, such as Qz/Fsp and dolomite. The downcore  
514 distribution pattern of this group changes from the affinity to interglacials in the lower  
515 part of the record to peaks in glacial/deglacial intervals related to MIS 4 and 6. The  
516 major source for pyroxene in the Arctic Ocean is the Siberian trap basaltic province  
517 that drains to the Kara Sea and western Laptev Sea ([Fig. 1](#); [Washner et al., 1999](#);  
518 [Schoster et al., 2000](#); [Krylov et al., 2008](#)). On the other hand, basaltic rocks related to  
519 the Okhotsk-Chukotka province ([Fig. 1](#)) may have also provided a significant source of



520 pyroxenes, as exemplified in surface sediments by a relative pyroxene enrichment in  
521 the Chukchi Basin on the background of overall low values in the western Arctic Ocean  
522 (Dong et al., 2014). Distributions of feldspar and plagioclase at the Siberian margin  
523 show elevated contents occurring both in the western Laptev Sea and the East  
524 Siberian Sea (Zou, 2016).

525       Based on a considerable affinity of the pyroxene-feldspar group to brown units  
526 and a lack of correlation with coarse sediment fractions, we infer that it is primarily  
527 related to sea-ice transport during interglacial/deglacial intervals, with sources  
528 potentially including the East Siberian margin and more westerly areas. The  
529 difference in both the sources and delivery processes from the LIS proxies may  
530 explain an especially strong opposition of these groups. Multiple studies suggest that  
531 sea ice from the Kara and Laptev seas may transport sediments to the Canada Basin  
532 under favorable atmospheric conditions, such as the positive phase of the Arctic  
533 Oscillation (Behrends, 1999; Darby et al., 2003; Darby et al., 2004; Yurco et al., 2010;  
534 Darby et al., 2012), although it remains to be investigated, to what extent this  
535 circulation pattern could have provided a significant sediment source for the western  
536 Arctic Ocean in the Pleistocene.

537

#### 538 **5.2.4 East-Siberian Ice Sheet**

539       The other group with a potentially Siberian provenance (Group 4: Fig. 6, Table 3)  
540 comprises clay minerals smectite, kaolinite, and chlorite, and is related to overall

541 coarse sediment, especially consistently to fine sand (63-250  $\mu\text{m}$ ). This composition is  
542 especially characteristic for intervals estimated as MIS 4, 6, and 12. The association  
543 of clay minerals with coarse sediment is unusual and suggests that they may have  
544 been derived by glacial erosion of source hard rocks. This linkage has been elaborated  
545 for kaolinite distribution in the Barents Sea and central Arctic Ocean (Junttila, 2007;  
546 Vogt and Knies, 2009; Krylov et al., 2014). While kaolinite sources, such as  
547 Meso-Cenozoic paleosols and shales, are mostly known in the western Arctic from  
548 northern Alaska and Canada (Naidu et al., 1971; Darby, 1975; Dalrymple and Maass,  
549 1987), kaolinite weathering crusts have been also described from the East Siberian  
550 margin (Slobodin et al, 1990; Kim and Slobodin, 1991). Smectite, which is typically  
551 related to chemical weathering of basic rocks has been mostly associated in Arctic  
552 sediments with delivery from Siberian trap basalts (Fig. 1) as reflected in the surface  
553 sediments, suspended particulate material, and sea-ice samples from the Kara Sea and  
554 western Laptev Sea (Stein et al., 1994; Wahsner et al., 1999; Schoster et al., 2000;  
555 Dethleff et al., 2000). Peaks of smectite related to that source are especially  
556 characteristic for deglacial intervals in sediment cores from the eastern Arctic Ocean  
557 (Vogt and Knies, 2008). However, considerable sources of smectite also exist further  
558 east along the Siberian margin due to basaltic outcrops related to the  
559 Okhotsk-Chukotka volcanic province (Fig. 1), resulting in high content of smectite in  
560 surface sediments of the East Siberian and Chukchi seas (Naidu et al., 1982;  
561 Viscosi-Shirley et al., 2003; Nwaodua et al., 2014). Chlorite is also common in  
562 surface sediments and suspended particulate material at the East Siberian margin

563 ([Dethleff et al., 2000](#); [Viscosi-Shirley et al., 2003](#)). Modern and Holocene sediments  
564 on the Chukchi shelf are especially enriched in chlorite due to advection from the  
565 North Pacific at high sea-level stands ([Kalinenko, 2001](#); [Ortiz et al., 2009](#); [Nwaodua  
566 et al., 2014](#); [Kobayashi et al., 2016](#)), however this mechanism is only applicable to  
567 interglacial periods.

568 We infer that sediment with a concerted enrichment in smectite, kaolinite, and  
569 chlorite clay minerals associated with coarse fractions was transported to the Canada  
570 Basin primarily in relation to the existence of large ice sheets in northern East Siberia  
571 during glacial periods. Radiogenic isotope signature in upper Quaternary records from  
572 the Mendeleev Ridge also indicates that the Okhotsk-Chukotka volcanic rocks  
573 provided one of the principal end members, especially during MIS 4 and 6  
574 ([Bazhenova, 2012](#); [Fagel et al., 2014](#)). This sediment had to be transported into the  
575 Arctic Ocean directly from the East-Siberian/Chukchi margin as the alternative  
576 pathway via the Bering Sea only operated at high interglacial sea levels, when the  
577 Bering Strait was open for throughflow (e.g., [Keigwin et al., 2006](#); [Ortiz et al., 2009](#)).  
578 Considering an affinity of the kaolinite-smectite-chlorite group with sediments  
579 coarser than clays, corresponding to grain-size modes 2 and 3, their distribution across  
580 the basin was likely related to iceberg rafting and glacial underflows, as discussed  
581 above in section 5.2.1. A relatively fast and direct delivery mechanism by debris  
582 flows and ensuing turbidites may explain a good preservation of fragile clay minerals,  
583 normally not resistant to physical erosion.

584 Some early paleoglaciological studies proposed the existence of a thick

585 Pleistocene ice sheet centered over the East Siberian shelf (Hughes et al., 1977;  
586 Grosswald and Hughes, 2002). The inference of former ice sheets/shelves in this  
587 region is now corroborated by multibeam bathymetry and sub-bottom data revealing  
588 multiple glacigenic features on the top and slopes of the Chukchi and East Siberian  
589 margin (Polyak et al., 2001, 2007; Jakobsson et al., 2008, 2014, 2016; Niessen et al.,  
590 2013; Dove et al., 2014). ESIS has also been reproduced by numerical paleoclimatic  
591 modeling for a large Pleistocene glaciation exemplified by MIS 6 (Colleoni et al.,  
592 2016). Sedimentary proxies indicative of the Okhotsk-Chukotka provenance in cores  
593 from the Canada Basin provide an additional tool for reconstructing the ESIS history.  
594

### 595 **5.2.5 Interglacial signature**

596 Data points from brown units make up a distinct PC loading group with Mn,  
597 foraminiferal numbers, and fine sediment as lead variables (Group 1: Fig. 6; Table 3).  
598 This composition is consistent with the modern-type Arctic Ocean environments  
599 characterized by predominant controls of sediment deposition by sea ice, considerable  
600 biological activity in summer, and high sea levels. The latter is important for  
601 providing supply of Mn from the surrounding shelves (März et al., 2011; Löwemark  
602 et al., 2014). The same condition may also control biological production, and thus  
603 foraminiferal numbers, via export of nutrients from the marginal seas (e.g., Xiao et al.,  
604 2014), although interaction of this factor with sea-ice conditions yet needs to be  
605 clarified.

606 The two minerals having the closest distribution to PC loading group 1,  
607 consistent with a predominant occurrence in brown, interglacial/major interstadial  
608 units, are illite and calcite (Figs. 5, 6). Illite is a typical high-latitude clay mineral,  
609 mainly supplied by physical weathering of metasedimentary and plutonic rocks  
610 (Chamley, 1989; Junttila, 2007). High illite concentrations in surficial Arctic Ocean  
611 sediments have been found in many areas including the Alaska margin and adjacent  
612 Canada basin (Dong et al., 2014; Kobayashi et al., 2016), East Siberian Sea and the  
613 adjacent part of the Laptev Sea (Wahsner et al., 1999; Kalinenko, 2001; Viscosi-  
614 Shirley et al., 2003; Dethleff, 2005; Zou., 2016), and northern Greenland and  
615 Svalbard regions (Stein et al., 1994). In core ARC4-BN05 illite has consistently high  
616 values in generally fine-grained brown units (Fig. 5), although peak values may not  
617 exactly coincide with those of Mn or foraminiferal numbers. In addition, illite shows a  
618 prominent peak in a very fine-grained interval at ~35 cm within glacial/deglacial  
619 sediment of estimated MIS 4. This distribution is consistent with the pattern in both  
620 surface sediments and sediment cores, where illite is characteristic for fine-grained  
621 sediment indicative of transportation by sea ice or in the water column (Krylov, 2014).  
622 As shown by sediment-core studies, these mechanisms can provide high illite levels  
623 under both interglacial (this study) and glacial/deglacial environments (Knies and  
624 Vogt, 2003; Yurco et al., 2010). The latter is probably associated with deposition of  
625 fine sediment from glacial overflows, as exemplified by the fine-grained part of MIS  
626 4 deglaciation.

627 High contents of calcite in core ARC4-BN05 co-occur with high numbers of

628 foraminifers (Figs. 3 and 6), indicating that calcite in these sediments is to a large  
629 extent biogenic, consistent with earlier results from the study area (Stein et al., 2010a).  
630 Nevertheless, in the lower part of the record, where calcareous fossils are mostly not  
631 preserved, calcite shows a considerable affinity to dolomite, which corroborates a  
632 mixed, biogenic and detrital nature of calcite in Arctic Ocean sediments (e.g., Vogt,  
633 1997).

634

### 635 **5.3 Evolution of sedimentary environments**

#### 636 **5.3.1 PC scores in the stratigraphic context**

637 The stratigraphically changing pattern of sediment delivery and deposition,  
638 including cyclic glacial-interglacial fluctuations and longer-term changes, indicates  
639 complex interactions of climatic and oceanographic factors controlling depositional  
640 environments. To gain more insight into these changes, we plotted the distribution of  
641 PC scores grouped by individual glacial and interglacial stages, along with the PC  
642 loading interpretation (Fig. 8).

643 A long-term trend in interglacial environments is indicated by a shift from (1)  
644 predominantly Siberian to more North American provenance, especially strong in  
645 MIS 5 and 1, and (2) from negative to increasingly positive scores of interglacial  
646 proxies with a threshold around the bottom of MIS 7 (Fig. 8a). Glacial environments  
647 show an apparently more complex provenance change, with Siberian sources  
648 predominating early and late glacial stages (MIS 12-14 and MIS 4-6, respectively)

649 and Laurentide provenance controlling MIS 8 and 10 ([Fig. 8b](#)). In addition,  
650 interglacial positive signature characterizes some intervals in MIS 4 and 6 as well as  
651 intermittent (stadial) intra-MIS 3, 5, and 7 events. We note that MIS 2 is not  
652 represented in this data due to its very compressed nature.

653

### 654 **5.3.1 Glacial environments**

655 The identified changes in sedimentary environments and provenance can be  
656 explained by several types of controls, including configuration of ice sheets against  
657 sea level and climatic conditions, sediment delivery mechanisms, and circulation. Ice  
658 sheet sites and geometry at specific time intervals dictate the timing and location of  
659 major sediment discharge events into the Arctic Ocean. Transportation mechanisms,  
660 such as by icebergs, debris flows, or suspension plumes, further control sediment  
661 delivery to specific sites. Finally, oceanic circulation affects the distribution of  
662 sediment across the oceanic basins. This may include surface circulation driving sea  
663 ice, icebergs, and surface plumes, deep circulation affecting turbidite/contourite  
664 pathways, and downwelling of sediment-laden dense waters.

665 We infer that sedimentary variations observed in core BN05 and correlative  
666 records from the western Arctic Ocean can be explained by the evolution of  
667 surrounding ice sheets and associated changes in oceanic conditions, such as  
668 circulation, sea ice, and biota. It has been known from early studies (e.g., [Clark et al.,  
669 1980; Winter et al., 1997](#)) that glacial, notably LIS impact on the western Arctic

670 Ocean has been steadily increasing over the time span covered by sediment cores  
671 from this region. A recent investigation utilizing a more up-to-date stratigraphic  
672 paradigm estimated the timing of a step increase in LIS inputs as ca. 0.8 Ma (Polyak  
673 et al., 2013), consistent with the onset of major glaciations in the Northern  
674 Hemisphere (Head and Gibbard, 2015). Core BN05 provides a record of sediment  
675 deposition in the Canada Basin, and thus glacial inputs into the western Arctic Ocean  
676 during most of the time interval to follow.

677       Considering the overall gradual growth of Pleistocene Arctic ice sheets, we infer  
678 that the shift from Siberian to North American sources between MIS 12 and 10 was  
679 primarily related to the expansion of the LIS, especially the northwestern Keewatin  
680 sector that discharges into the western Arctic Ocean. However, its further growth may  
681 have had an opposite effect due to a more massive ice sheet that required warmer  
682 climatic conditions and/or higher sea levels to destabilize it. Based on data for the last  
683 glacial cycle, the Keewatin sector of the LIS rested mostly on relatively elevated  
684 terrane of the Canadian Archipelago and adjacent mainland, fringed by a narrow  
685 continental shelf and dissected by numerous channels providing conduits for ice  
686 streams and evacuation of icebergs at rising sea levels (Stokes et al., 2005, 2009;  
687 England et al., 2009; Margold et al., 2015). The latter events are illustrated in BN05  
688 data by intra-MIS 5 stadials with a consistent LIS signature (Fig. 8b). Especially high  
689 LIS scores characterize PW layers 2 and 3 attributed to MIS 5d and late MIS 3,  
690 respectively. A similar, LIS-dominated pattern likely represents the last deglaciation as  
691 indicated by a number of provenance studies (e.g., Stokes et al., 2005; Bazhenova,



692 [2012; Jang et al., 2013](#)).

693 In comparison to the LIS, a presumably much smaller ESIS, formed on a broad  
694 and overall flat East-Siberian/Chukchi margin ([Niessen et al., 2013; Dove et al., 2014;](#)  
695 [Colleoni et al., 2016](#)), had to be responsive to sea-level changes even at low levels. It  
696 may be possible that the ESIS also increased in size by MIS 6, known as a time of a  
697 dramatic increase of glacial inputs from the Barents-Kara Ice Sheet into the eastern  
698 Arctic Ocean (e.g., [O'Regan et al., 2008](#)). A synchronous MIS 6 expansion of both  
699 North American and Siberian ice sheets and related ice shelves might explain the  
700 deep-keel glacial erosion of the Lomonosov Ridge at modern water depths exceeding  
701 1000 m ([Jakobsson et al., 2016, and references therein](#)).

702 A concurrent interpretation can be proposed with a focus on sediment  
703 transportation processes as deposits of some glacial intervals, notably MIS 12 and  
704 parts of MIS 4 and 6, are associated with grain size mode 2 potentially indicating  
705 glacial debris flow/turbidite emplacement. Large debris flows entering the Chukchi  
706 Basin and continuing as turbidites into Canada Basin, as exemplified by subbottom  
707 sonar profiles ([Niessen et al., 2013; Dove et al., 2014](#)), may have overprinted  
708 deposition from icebergs. We note that deposits of MIS 4 and 6 also contain intervals,  
709 where Siberian provenance is combined with interglacial positive scores ([Fig. 8b](#)) due  
710 to their fine-grained composition along with high illite content. These sediments  
711 likely represent deposition from suspension plumes, potentially marking especially  
712 strong deglacial meltwater discharge. A prominent fine grained, finely laminated  
713 interval within MIS 4 deglaciation (possibly extending into MIS 3) has been reported

714 from multiple cores across the Chukchi Basin – Mendeleev Ridge area ([Adler et al.,](#)  
715 [2009; Matthiessen et al., 2010; Bazhenova, 2012; Wang et al., 2013](#)).

716 Under modern conditions the BN05 site is mostly controlled by the Beaufort  
717 Gyre current circulation system, although can also be affected by the Transpolar Drift  
718 during strong shifts in the Arctic Oscillation ([Rigor et al., 2002](#)). This setting  
719 probably applies to the Holocene and comparable interglacial conditions ([Darby and](#)  
720 [Bischof, 2004](#)). Some authors suggested that during glacial periods the surface  
721 circulation that controls pathways of iceberg and sea-ice drift may have been  
722 considerably different from the modern pattern, with both North American and  
723 Siberian sources shortcutting the Arctic Ocean towards the Fram Strait ([Bischof and](#)  
724 [Darby, 1997; Stürz et al., 2012](#)). These changes would have potentially affected the  
725 study area, possibly making it more exposed to the Siberian provenance than under  
726 present conditions. However, the existing reconstructions based on very limited  
727 records with only crude stratigraphic controls, need to be elaborated by spatially and  
728 stratigraphically more representative data constraining past circulation changes. In  
729 particular, glacial maxima may be elusive, especially in the western Arctic Ocean, due  
730 to extremely low sedimentation rates or a hiatus, as exemplified by the Last Glacial  
731 Maximum ([Polyak et al., 2009; Poirier et al., 2012](#)).

732 An overall integration of potential controls on sediment deposition in the study  
733 area during major identified types of glacial environments are illustrated in [Fig. 9](#).  
734 More studies are needed to discriminate between different controls, including proxy  
735 records providing higher resolution for target intervals as well as modeling

736 experiments to test spatial and stratigraphic variability in such factors as iceberg and  
737 meltwater discharge and their ensuing distribution pathways.

738

### 739 **5.3.2 Interglacial environments**

740 The long-term trend in interglacial environments reflected in a shift from  
741 negative to increasingly positive scores of interglacial proxies with a threshold around  
742 the bottom of MIS 7 (Fig. 8a) can be partially explained by the absence of calcareous  
743 foraminifers in the lower part of the record. However, even MIS 11 that has abundant  
744 foraminifers is in the interglacial negative domain, suggesting more controls. One  
745 possibility is that this trend was related to the evolution of circum-Arctic ice sheets  
746 that would have inevitable incurred changes in oceanic conditions, such as circulation  
747 and sea ice. An expansion of perennial sea ice in the western Arctic Ocean near the  
748 MIS 7 bottom has been proposed based on foraminiferal assemblages (Polyak et al.,  
749 2013; Lazar and Polyak, 2016). This step change has been tentatively attributed to the  
750 LIS growth that may have affected sea-ice conditions via increased albedo and/or  
751 higher meltwater inputs. This inference is consistent with a change from Siberian to  
752 North American provenance during interglacials in BN05 (Fig. 8a). In addition to a  
753 more lingering LIS during interstadials/interglacials, this shift in provenance could be  
754 related to a strengthening of the Beaufort Gyre as more sea ice filled the western  
755 Arctic Ocean.

756 More limited sea-ice cover in the older part of the middle Pleistocene could have

757 also enhanced the production of dense brines at the Siberian margin, resulting in a  
758 deeper convection and cascading of shelf sediments to the deep basin. This scenario  
759 would explain an unusual grain-size composition of sediments in the older  
760 interglacials combining mode 2, indicative of winnowed silt, with a typical  
761 interglacial fine-grained mode 1.

762

## 763 **6. Summary and conclusions**

764 Sediment core ARC4–BN05 was collected from the Canada Basin in the vicinity  
765 of the Chukchi Plateau and the Mendeleev Ridge, Arctic Ocean, on the fourth Chinese  
766 National Arctic Research Expedition (CHINARE-IV). Based on correlation to earlier  
767 proposed Arctic Ocean stratigraphies (e.g., [Adler et al., 2009](#); [Stein et al., 2010a](#);  
768 [Polyak et al., 2013](#)) and AMS <sup>14</sup>C dating of the youngest sediments, the BN05 record  
769 covers the late to middle Quaternary (MIS 1-15, ca. 0.5-0.6 Ma). The core was  
770 investigated for multiple sedimentary proxies including clay and bulk mineralogy,  
771 grain size, paleomagnetism, elemental content, and planktonic foraminiferal numbers  
772 with an average estimated age resolution of 4-5 ka per sample. This study, facilitated  
773 by Principal Component Analysis of major paleoceanographic variables, provides  
774 important new information about sedimentary environments and provenance in the  
775 western Arctic Ocean on glacial time scales. The results enhance our knowledge on  
776 the history of Arctic glaciations and interglacial conditions.

777 Glacially derived sediment can be discriminated between the North American

778 and Siberian provenance by their mineralogical and textural signature. In particular,  
779 peaks of dolomite debris, including large dropstones, track the Laurentide Ice Sheet  
780 (LIS) discharge events, while the East Siberian Ice Sheet (ESIS) inputs are inferred  
781 from combined peaks of smectite, kaolinite, and chlorite associated with coarse  
782 sediment. Siberian provenance is also identified from high content of pyroxene,  
783 feldspar, and plagioclase, unrelated to coarse sediment. This sedimentary signature is  
784 interpreted to indicate sea-ice transport from the Siberian margin during  
785 interglacial/deglacial intervals. Full interglacial environments are characterized by  
786 overall fine grain size, high content of Mn (and resulting dark brown sediment color),  
787 and elevated contents of calcite and chlorite. Foraminiferal tests are abundant in  
788 interglacial units in the upper part of the record (MIS 1-7) and estimated MIS 11, but  
789 have very low numbers in other interglacials older than MIS 7, apparently due to  
790 dissolution.

791 In addition to glacial-interglacial cyclicity, the investigated record indicates  
792 variable impacts of LIS vs. ESIS on sediment inputs at different glacial events, along  
793 with a long-term change in middle to late Quaternary sedimentary environments.  
794 Based on the age model employed, major LIS inputs to the study area occurred during  
795 MIS 3, intra-MIS 5 and 7 events, MIS 8, and MIS 10, while ESIS signature is  
796 characteristic for MIS 4, MIS 6 and MIS 12. These differences may be related to  
797 ice-sheet configurations at different sea levels, sediment delivery mechanisms  
798 (iceberg rafting, suspension plumes, and debris flows), and surface circulation. A  
799 long-term shift in the pattern of sediment inputs shows an apparent step change near

800 the estimated MIS 7/8 boundary (ca. 0.25 Ma), consistent with more sea-ice growth in  
801 the Arctic Ocean inferred from benthic foraminiferal assemblages (Lazar and Polyak,  
802 2016). This development of Arctic Ocean paleoenvironments possibly indicates an  
803 overall glacial expansion at the western Arctic margins, especially in North America.  
804 Such expansion may have affected not only glacial, but also interglacial conditions  
805 via increased albedo and/or higher meltwater inputs, as well as a strengthening of the  
806 Beaufort Gyre circulation as more sea ice filled the western Arctic Ocean.

807

## 808 **Acknowledgements**

809 We are grateful to the term of the Chinese fourth Arctic scientific expedition for  
810 their assistance with sample collection. Special thanks are extended to Dr. Shijuan  
811 Yan for the help with sampling and to Dr. Quanshu Yan for the help in editing of the  
812 paper. This work was jointly supported by the Research Foundation of the First  
813 Institute of Oceanography, State Oceanic Administration of China (No. 2013G07,  
814 2014G30), the Chinese Special Project of Arctic Ocean Marine Geology Investigation  
815 (No. CHINARE 2016-03-02), and the National Natural Science Foundation of China  
816 (No. 41306205, 41676053, 40176136).

817

818

819 **References**

- 820 [1] Adler, R. E., Polyak, L., Ortiz, J. D., Kaufman, D. S., Channell, J. E.T., Xuan, C., Grottoli, A. G., Sellén,  
821 E., Crawford, K. A.: Sediment record from the western Arctic Ocean with an improved Late Quaternary  
822 age resolution: HOTRAX core HLY0503-8JPC, Mendeleev Ridge, **Global and Planetary Change**,  
823 68,18-29,2009.
- 824 [2] Andrews, J. T.: Icebergs and iceberg rafted detritus (IRD) in the North Atlantic: Facts and assumptions,  
825 **Oceanography**, 13(3), 100–108, 2000.
- 826 [3] Basilyan, A.E., Nikol'skiy, P.A., Maksimov, F.E., Kuznetsov, V.Y.: Age of Cover Glaciation of the New  
827 Siberian Islands Based on <sup>230</sup>Th/U-dating of Mollusk Shells, **Structure and Development of the**  
828 **Lithosphere**, Paulsen, Moscow, pp. 506-514, 2010.
- 829 [4] Bazhenova, E.: Reconstruction of late Quaternary sedimentary environments at the southern Mendeleev  
830 Ridge (Arctic Ocean), **PhD Thesis**, University of Bremen, Bremen, 83 p, 2012.
- 831 [5] Behrends, M.: Reconstruction of sea-ice drift and terrigenous sediment supply in the Late Quaternary:  
832 heavy-mineral associations in sediments of the Laptev-Sea continental margin and the central Arctic  
833 Ocean, **Reports on Polar Research**, 310, 1-167, 1999.
- 834 [6] Beuselinck, L., Govers, G., Poesen, J., Degraer, G., Froyen, L.: Grain-size analysis by laser diffractometry:  
835 comparison with the sieve-pipette method, **Catena**, 32, 193–208, 1998.
- 836 [7] Bischof, J. F. and Darby, D. A.: Mid-to Late Pleistocene ice drift in the Western Arctic Ocean: evidence  
837 for a different circulation in the past, **Science**, 277, 74–78, 1997.
- 838 [8] Bischof, J.F., Clark, D.L., Vincent, J.S.: Origin of ice-rafted debris: Pleistocene paleoceanography in the  
839 western Arctic Ocean, **Paleoceanography**, 11, 743–756, 1996.
- 840 [9] Biscaye, P.F.: Distinction between kaolinite and chlorite in recent sediments by X-ray diffraction,  
841 **American Mineralogist**, 49, 1281–1289, 1964.
- 842 [10] Biscaye, P.F.: Mineralogy and sedimentation of recent deep-sea clay in the Atlantic Ocean and adjacent  
843 seas and oceans, **The Geological Society America Bulletin**, 76, 803–832, 1965.
- 844 [11] Chamley, H.: Clay Sedimentology, **Springer**, Berlin. 623 pp, 1989.
- 845 [12] Clark, D. L., Whitman, R. R., Morgan, K. A., Mackey, S. D.: Stratigraphy and glacialmarine sediments  
846 of the Amerasian Basin, central Arctic Ocean, **Geological Society of America**, Special Paper, 181, 57,  
847 1980.

- 848 [13] Clark, D. and Hanson, A.: Central Arctic Ocean sediment texture: a key to ice transport mechanisms. **In:**  
849 **Molnia, B.F. (Ed.), Glacial-Marine Sedimentation, Plenum Press**, New York, pp. 301–330, 1983.
- 850 [14] Clark, D. L., Chern, L. A., Hogler, J. A., Mennicke, C. M., Atkins, E. D.: Late Neogene climate evolution  
851 of the central Arctic Ocean, **Marine Geology**, 93, 69–94, 1990.
- 852 [15] Colleoni, F., Kirchner, N., Niessen, F., Quiquet, A., Liakka, J.: An East Siberian ice shelf during the Late  
853 Pleistocene glaciations: Numerical reconstructions, **Quaternary Science Reviews**, xxx,1-16, 2016.
- 854 [16] Cook, H. E., Johnson, P.D., Matti, J.C., Zemmels, I.: Methods of sample preparation and X- ray  
855 diffraction data analysis, X-ray mineralogy laboratory, **In: Kaneps AG**, ed. Init Repts, DSDP XXVIII,  
856 999 -1007, [http://www.deepseadrilling.Org/28/volume/dsdp28- appendix-IV. Pdf](http://www.deepseadrilling.Org/28/volume/dsdp28-appendix-IV.Pdf), 1975.
- 857 [17] Coulthard, R.D., Furze, M.F.A., Pienkowski, A.J., Nixon, F.C., England, J.H.: New marine  $\Delta R$  values for  
858 Arctic Canada, **Quaternary Geochronology**, 5, 419–434, 2010.
- 859 [18] Cronin, T.M., Polyak, L., Reed, D., Kandiano, E.S., Marzen, R.E., Council, E.A.: A 600-ka Arctic sea-ice  
860 record from Mendeleev Ridge based on ostracodes, **Quaternary Science Reviews**, 79, 157–167, 2013.
- 861 [19] Dalrymple, R.W. and Maass, O. C.: Clay mineralogy of late Cenozoic sediments in the CESAR cores,  
862 Alpha Ridge, central Arctic ocean, **Canadian Journal of Earth Science**, 24, 1562–1569, 1987.
- 863 [20] Darby, D.A.: Kaolinite and other clay minerals in Arctic Ocean sediments, **Journal of Sedimentary**  
864 **Petrology**, 45,272–279, 1975.
- 865 [21] Darby, D. A., Bischof, J. F., Jones, G. A.: Radiocarbon chronology of depositional regimes in the western  
866 Arctic Ocean, **Deep Sea Research Part II**, 44 (8), 1745–1757, 1997.
- 867 [22] Darby, D. A., Bischof, J. F., Spielhagen, R. F., Marshall, S. A., Herman, S. W.: Arctic ice export events  
868 and their potential impact on global climate during the Late Pleistocene, **Paleoceanography**, 17(2), 1025,  
869 doi:10.1029/2001PA000639, 2002.
- 870 [23] Darby, D. A.: Sources of sediment found in sea ice from the western Arctic Ocean, new insights into  
871 processes of entrainment and drift patterns, **Journal of Geophysical Research**, 108(C8), 3257,  
872 doi:10.1029/2002JC001350, 2003.
- 873 [24] Darby, D. A., and Bischof, J. F.: A Holocene record of changing Arctic Ocean ice drift, analogous to the  
874 effects of the Arctic Oscillation, **Paleoceanography**, 19, PA1027, doi:10.1029/2003PA000961, 2004.
- 875 [25] Darby, D.A., Polyak, L., Bauch, H.A.: Past glacial and interglacial conditions in the Arctic Ocean and  
876 marginal seas — a review, **Progress in Oceanography**, 71,129–144, 2006.
- 877 [26] Darby, D. A., Ortiz, J., Polyak, L., Lund, S., Jakobsson, M., Woodgate, R.A.: The role of currents and sea



878 ice in both slowly deposited central Arctic and rapidly deposited Chukchi-Alaskan margin sediments,  
879 **Global and Planetary Change**, 68, 58-72, 2009.

880 [27] Darby, D. A., Myers, W., Jakobsson, M., Rigo, I.: Modern dirty sea ice characteristics and sources: The  
881 role of anchor ice, **Journal of Geophysical Research**, 116: C09008, doi:10.1029/2010JC006675, 2011.

882 [28] Darby, D., Ortiz, J., Grosch, C., Lund, S.: 1,500-year cycle in the Arctic Oscillation identified in  
883 Holocene Arctic sea-ice drift. **Nature Geoscience** 5, 897–900, 2012.

884 [29] Dethleff, D. A., Rachold, V., Tintelnot, T., Antonow, M.: Sea-ice transport of riverine particles from the  
885 Laptev Sea to Fram Strait based on clay mineral studies, **International Journal of Earth Science**, 89,  
886 496–502, 2000.

887 [30] Dethleff, D.: Entrainment and export of Laptev Sea ice sediments, Siberian Arctic, **Journal of**  
888 **Geophysical Research—Oceans** 110, C07009, doi:10.1029/2004JC002740, 2005.

889 [31] Dove, D., Polyak, L., Coakley, B.: Widespread, multi-source glacial erosion on the Chukchi margin,  
890 Arctic Ocean, **Quaternary Science Reviews**, 92, 112-122, 2014.

891 [32] Dong, L., Shi, X., Liu, Y., Fang, X., Chen, Z., Wang, C., Zou, J., Huang, Y.: Mineralogical study of  
892 surface sediments in the western Arctic Ocean and their implications for material sources, **Advances in**  
893 **Polar Science**, 25(3),192-203, 2014.

894 [33] Dowdeswell, J. A., Villinger, H., Whittington, R. J., Marienfeld, P.: Iceberg scouring in Scoresby Sund  
895 and on the East Greenland continental shelf, **Marine Geology**, 111, 37–53, 1993.

896 [34] Dyke, A. S., Andrews, J. T., Clark, P. U., England, J. H., Miller, G. H., Shaw, J., Veillette, J. J.: The  
897 Laurentide and Innuitian ice sheets during the Last Glacial Maximum, **Quaternary Science Review**, 21,  
898 9–31, 2002.

899 [35] England, J.H., Furze, M.F.A., Doupé, J. P.: Revision of the NW Laurentide Ice Sheet: implications for  
900 paleoclimate, the northeast extremity of Beringia, and Arctic Ocean sedimentation, **Quaternary Science**  
901 **Review**, 28, 1573-1596, 2009.

902 [36] Fagel, N., Not, C., Gueibe, J., Mattielli, N., Bazhenova, E.: Late Quaternary evolution of sediment  
903 provenances in the Central Arctic Ocean: mineral assemblage, trace element composition and Nd and Pb  
904 isotope fingerprints of detrital fraction from the Northern Mendeleev Ridge, **Quaternary Science**  
905 **Reviews**, 92,140-154, 2014.

906 [37] Grosswald, M.G and Hughes, T.J.: The Russian component of an Arctic Ice Sheet during the Last Glacial  
907 Maximum, **Quaternary Science Review**, 21, 121-146, 2002.

- 908 [38] Haley, B.A. and Polyak, L.: Pre-modern Arctic Ocean circulation from surface sediment neodymium  
909 isotopes, **Geophys. Res. Lett.**, 40, 1–5, 2013.
- 910 [39] Hanslik, D., Jakobsson, M., Backman, J., Björck, S., Sellén, E., O'Regan, M., Fornaciari, E., Skog, G.:  
911 Quaternary Arctic Ocean sea ice variations and radiocarbon reservoir age corrections, **Quaternary**  
912 **Science Reviews** , 29, 3430–3441 , 2010.
- 913 [40] Head, M.J. and Gibbard, P. L.: Early-Middle Pleistocene transitions: linking terrestrial and marine realms,  
914 **Quaternary International**, 389, 7-46, 2015.
- 915 [41] Hebbeln, D.: Flux of ice-rafted detritus from sea ice in the Fram Strait, **Deep-Sea Research Part II**, 47,  
916 1773–1790, 2000.
- 917 [42] Hesse, R. and Khodabakhsh, S.: Anatomy of Labrador Sea Heinrich layers, **Marine Geology**, 380, 44–66,  
918 2016.
- 919 [43] Hughes, T.J., Denton, G.H., Grosswald, M.G: Was there a late-Würm Arctic ice sheet? **Nature**, 266,  
920 596-602, 1977.
- 921 [44] Jakobsson, M., Løvlie, R., Al-Hanbali, H., Arnold, E., Backman, J., Mörth, M.: Manganese and color  
922 cycle in Arctic Ocean sediments constrain Pleistocene chronology, **Geology**, 28, 23–26, 2000.
- 923 [45] Jakobsson, M., Polyak, L., Edwards, M., Kleman, J., Coakley, B.: Glacial geomorphology of the Central  
924 Arctic Ocean: the Chukchi Borderland and the Lomonosov Ridge, **Earth Surface Processes and**  
925 **Landforms**, 33, 526–545, 2008.
- 926 [46] Jakobsson, M., Andreassen, K., Bjarnadóttir, L. R., Dove, D., Dowdeswell, J. A., England, J.H., Funder,  
927 S., Hogan, K., Ingólfsson, Ó., Jennings, A., Larsen, N, K., Kirchner, N., Landvik, J.Y., Mayer, L.,  
928 Mikkelsen, N., Möller, P., Niessen, F., Nilsson, J., O'Regan, M., Polyak, L., Nørgaard-Pedersen, N.,  
929 Stein. R.: Arctic Ocean glacial history, **Quaternary Science Reviews**, 92, 40–67, 2014.
- 930 [47] Jakobsson, M., Nilsson, J., Anderson, L., Backman, J., Björck, G., Cronin, T.M., Kirchner, N.,  
931 Koshurnikov, A., Mayer, L., Noormets, R., O'Regan, M., Stranne, C., Ananiev, R., Macho, N. B.,  
932 Cherniykh, D., Coxall, H., Eriksson, B., Flodén, T., Gemery, L., Gustafsson, O., Jerram, K., Johansson, C.,  
933 Khortov, A., Mohammad, R., Semiletov, I.: Evidence for an ice shelf covering the central Arctic Ocean  
934 during the penultimate glaciation, **Nature Communications** , doi: 10.1038/ncomms10365, 2016.
- 935 [48] Jang, K., Han, Y., Huh, Y., Nam, S., Stein, R., Mackensen, A., Matthiessen, J.: Glacial freshwater  
936 discharge events recorded by authigenic neodymium isotopes in sediments from the Mendeleev Ridge,  
937 western Arctic Ocean, **Earth and Planetary Science Letters**, 369-370, 148–157, 2013.

- 938 [49] Junttila, J.: Clay minerals in response to Mid-Pliocene glacial history and climate in the polar regions  
939 (ODP, Site 1165, Prydz Bay, Antarctica and Site 911, Yermak Plateau, Arctic Ocean), **Acta Universitat**  
940 **Ouluensis**, A 481,2007.
- 941 [50] Kalinenko, V.V.: Clay minerals in sediments of the Arctic Seas. **Lithology and Mineral Resources**, 36,  
942 362–372, 2001.
- 943 [51] Kaparulina, E., Strand, K., Lunkka, J. P.: Provenance analysis of central Arctic Ocean sediments:  
944 Implications for circum-Arctic ice sheet dynamics and ocean circulation during Late Pleistocene,  
945 **Quaternary Science Reviews**, XXX, 1-11, 2015.
- 946 [52] Keigwin, L.D., Donnelly, J.P., Cook, M.S., Driscoll, N.W., Brigham-Grette, J.: Rapid sea-level rise and  
947 Holocene climate in the Chukchi Sea, **Geology**, 34 (10), 861–864, doi:10.1130/G22712.1, 2006.
- 948 [53] Kim, B.I. and Slobodin, V.Ya.: Main stages of the evolution of East Arctic shelves of Russia and  
949 Canadian Arctic in the Paleogene and Neogene, **In: Geologiya skladchatogo obramleniya**  
950 **Ameraziiskogo subbasseina (Geology of the Folded Framing of the Amerasian Subbasin)**, St.  
951 Petersburg: Sevmorgeologiya, 104–116, 1991.
- 952 [54] Knies, J., Kleiber, H. P., Matthiessen, J., Müller, C., Nowaczyk, N.: Marine ice-rafted debris records  
953 constrain maximum extent of Saalian and Weichselian ice-sheets along the northern Eurasian margin,  
954 **Global and Planetary Change**, 31, 45–64, 2001.
- 955 [55] Knies, J. and Vogt, C.: Freshwater pulses in the eastern Arctic Ocean during Saalian and early  
956 Weichselian ice-sheet collapse, **Quaternary Research**, 60, 243–251, 2003.
- 957 [56] Kobayashi, D., Yamamoto, M., Tirino, T., Nam, S.-I., Park, Y.-H., Harada, N., Nagashima, K., Chikita,  
958 K., Saitoh, S.I.: Distribution of detrital minerals and sediment color in western Arctic Ocean and  
959 northern Bering Sea sediments: changes in the provenance of western Arctic Ocean sediments since the  
960 last glacial period, **Polar Science**, 10, 519–531, 2016.
- 961 [57] Krylov, A. A., Andreeva I. A., Vogt C., Backman J., Krupskaya V. V., Grikurov G. E., Moran K., Shoji H.:  
962 A shift in heavy and clay mineral provenance indicates a middle Miocene onset of a perennial sea ice  
963 cover in the Arctic Ocean, **Paleoceanography**, 23, PA1S06, doi:10.1029/2007PA001497, 2008.
- 964 [58] Krylov, A.A., Stein, R., Ermakova, L.A. Clay minerals as indicators of late quaternary sedimentation  
965 constraints in the Mendeleev Rise, Amerasian Basin, Arctic Ocean, **Lithology and Mineral Resources**,  
966 49, 103-116, 2014.
- 967 [59] Larsen, E., Kjær, K.H., Demidov, I.N., Funder, S., Grøsfjeld, K., Houmark-Nielsen, M., Jensen, M.,

968 Linge, H., Lyså, A.: Late Pleistocene glacial and lake history of northwestern Russia, **Boreas**, 35,  
969 394-424 , 2006.

970 [60] Lazar, K.B. and Polyak, L.: Pleistocene benthic foraminifers in the Arctic Ocean: Implications for seaice  
971 and circulation history, **Marine Micropaleontology**, 126, 19-30, 2016.

972 [61] Löwemark, L., März, C., O'Regan, M., Gyllencreutz, R. Arctic Ocean Mn-stratigraphy: genesis,  
973 synthesis and inter-basin correlation, **Quaternary Science Reviews**, 92, 97-111, 2014.

974 [62] Margold M., Stokes C. R., Clark C. D.: Ice streams in the Laurentide Ice Sheet: Identification,  
975 characteristics and comparison to modern ice sheets, **Earth-Science Reviews**, 143, 117–146, 2015.

976 [63] März, C., Stratmann, A., Matthiessen, J., Meinhardt, A., Eckert, S., Schnetger, B., Vogt, C., Stein, R.,  
977 Brumsack, H.: Manganese-rich brown layers in Arctic Ocean sediments: composition, formation  
978 mechanisms, and diagenetic overprint. **Geochimica et Cosmochimica Acta**, 75, 7668–7687, 2011.

979 [64] Matthiessen, J., Niessen F., Stein, R., Naafs, B. D.: Pleistocene Glacial Marine Sedimentary  
980 Environments at the Eastern Mendeleev Ridge, Arctic Ocean, **Polarforschung**, 79 (2), 123 – 137, 2009  
981 (erschienen 2010).

982 [65] Naidu, A.S., Burrell, D.C., Hood, D.W.: Clay mineral composition and geological significance of some  
983 Beaufort Sea sediments, **Journal of Sedimentary Petrology**, 41, 691–694, 1971.

984 [66] Naidu, A. S., Creager, J. S., Mowatt, T. C.: Clay mineral dispersal patterns in the north Bering and  
985 Chukchi Seas. **Marine Geology**, 47(1), 1-15, 1982.

986 [67] Niessen, F., Hong, J.K., Hegewald, A., Matthiessen, J., Stein, R., Kim, H., Kim, S., Jensen, L., Jokat, W.,  
987 Nam, S.-I., Kang, S.-H.: Repeated Pleistocene glaciation of the East Siberian Continental Margin,  
988 **Nature Geoscience**, 6, 842-846, 2013.

989 [68] Nürnberg, D., Wollenburg, I., Dethleff, D., Eicken, H., Kassens, H., Letzig, T., Reimnitz, E., Thiede, J.:  
990 Sediments in Arctic sea ice: Implications for entrainment, transport and release, **Marine Geology**, 119,  
991 185–214, 1994.

992 [69] Nwaodua, E.C., Ortiz J. D., Griffith E. M.: Diffuse spectral reflectance of surficial sediments indicates  
993 sedimentary environments on the shelves of the Bering Sea and western Arctic, **Marine Geology**, 355,  
994 218–233, 2014.

995 [70] O'Regan, M., King, J., Backman, J., Jakobsson, M., Pälike, H., Moran, K., Heil, C., Sakamoto, T., Cronin,  
996 T.M., Jordan, R.W.: Constraints on the Pleistocene chronology of sediments from the Lomonosov Ridge,  
997 **Paleoceanography**, 23, PA1S19, doi:10.1029/2007PA001551 , 2008.

- 998 [71] Ortiz, J.D., Polyak, L., Grebmeier, J.M., Darby, D., Eberl, D.D., Naidu, S., Nof, D.: Provenance of  
 999 Holocene sediment on the Chukchi–Alaskan margin based on combined diffuse spectral reflectance and  
 1000 quantitative X-Ray diffraction analysis, **Global and Planetary Change**, 68 (no. 1–2), 73–84, 2009.
- 1001 [72] Phillips, R. L. and Grantz, A.: Regional variations in provenance and abundance of ice-rafted clasts in  
 1002 Arctic Ocean sediments: Implications for the configuration of late Quaternary oceanic and atmospheric  
 1003 circulation in the Arctic, **Marine Geology**, 172, 91–115, 2001.
- 1004 [73] Poirier, R.K., Cronin, T.M., Briggs Jr., W.M., Lockwood, R.: Central Arctic paleoceanography for the last  
 1005 50 kyr based on ostracode faunal assemblages, **Marine Micropaleontology**, 88–89, 65–76, 2012.
- 1006 [74] Polyak, L., Edwards, M.H., Coakley, B.J., Jakobsson, M.: Ice shelves in the Pleistocene Arctic Ocean  
 1007 inferred from glaciogenic deep-sea bedforms, **Nature**, 410, 453–459, 2001.
- 1008 [75] Polyak, L. V., Curry, W. B., Darby, D. A., Bischof, J., Cronin, T. M.: Contrasting glacial/interglacial  
 1009 regimes in the Western Arctic Ocean as exemplified by a sedimentary record from the Mendeleev Ridge,  
 1010 **Palaeogeography, Palaeoclimatology, Palaeoecology**, 203, 73–93, 2004.
- 1011 [76] Polyak, L., Darby, D.A., Bischof, J., Jakobsson, M.: Stratigraphic constraints on late Pleistocene glacial  
 1012 erosion and deglaciation of the Chukchi margin, Arctic Ocean, **Quaternary Research**, 67:234–245,  
 1013 doi:10.1016/j.yqres.2006.08.001, 2007.
- 1014 [77] Polyak, L., Bischof, J., Ortiz, J.D., Darby, D.A., Channell, J.E.T., Xuan, C., Kaufman, D.S., Lovlie, R.,  
 1015 Schneider, D.A., Eberl, D.D., Adler, R.E., Council, E.A.: Late Quaternary stratigraphy and sedimentation  
 1016 patterns in the western Arctic Ocean, **Global and Planetary Change**, 68, 5-17, 2009.
- 1017 [78] Polyak, L., Alley, R.B., Andrews, J.T., Brigham-Grette, J., Cronin, T.M., Darby, D.A., Dyke, A.S.,  
 1018 Fitzpatrick, J.J., Funder, S., Holland, M., Jennings, A.E., Miller, G.H., O'Regan, M., Savelle, J., Serreze,  
 1019 M., St. John, K., White, J.W.C., Wolff, E.: History of sea ice in the Arctic, **Quaternary Science Reviews**,  
 1020 29, 1757-1778, 2010.
- 1021 [79] Polyak, L., Best, K. M., Crawford, K. A., Council, E. A., St-Onge, G.: Quaternary history of sea ice in the  
 1022 western Arctic Ocean based on foraminifera, **Quaternary Science Reviews**, 79, 145-156, 2013.
- 1023 [80] Ramaswamy V. and Rao P. S.: Grain Size Analysis of Sediments from the Northern Andaman Sea:  
 1024 Comparison of Laser Diffraction and Sieve-Pipette Techniques, **Journal of Coastal Research**, 22,  
 1025 1000–1009, 2006.
- 1026 [81] Rigor, I.G., Wallace, J.M., Colony, R.L.: Response of sea ice to the Arctic Oscillation, **Journal of**  
 1027 **Climate**, 15, 2648–2663, 2002.

- 1028 [82] Rudels, B.: Arctic Ocean circulation. **Encyclopedia of Ocean Sciences**, J.H. Steele, K.K. Turekian,  
1029 **S.A. Thorpe (Eds.-in-Chief)**, Elsevier, 211-225, 2009.
- 1030 [83] Sharma, M., Basu, A.R., Nesterenko, G. V.: Temporal Sr-, Nd- and Pb isotopic variations in the Siberian  
1031 flood basalts: implications for the plume-source characteristics, **Earth and Planetary Science Letters**,  
1032 113, 365-381, 1992.
- 1033 [84] Slobodin, V.Ya., Kim, B.I., Stepanova, G.V., Kovalenko, F.Ya.: Differentiation of the Aion borehole  
1034 section based on the biostratigraphic data, **In: Stratigrafiya i paleontologiya mezo-kainozoya**  
1035 **Sovetskoi Arktiki (Stratigraphy and Paleontology of the Meso-Cenozoic in the Soviet Arctic)**,  
1036 Leningrad: Sevmorgeologiya, 43–58, 1990.
- 1037 [85] Spielhagen, R. F., Bonani, G., Eisenhauer, A., Frank, M., Frederichs, T., Kassens, H., Kubik, P. W.,  
1038 Mangini, A., Nørgaard-Pedersen, N., Nowaczyk, N. R., Schäper, S., Stein, R., Thiede, J., Tiedemann, R.,  
1039 Wahsner, M.: Arctic Ocean evidence for Late Quaternary initiation of northern Eurasian ice sheets,  
1040 **Geology**, 25, 783–786 ,1997.
- 1041 [86] Spielhagen, R. F., Baumann, K. H., Erlenkeuser, H., Nowaczyk, N. R., Nørgaard-Pedersen, N., Vogt, C.,  
1042 Weiel, D. Arctic Ocean deep-sea record of Northern Eurasian ice sheet history, **Quaternary Science**  
1043 **Review**, 23, 1455–1483, 2004.
- 1044 [87] Schoster, F., Behrends, M., Müller, C., Stein, R., Wahsner, M.: Modern river discharge in the Eurasian  
1045 Arctic Ocean: Evidence from mineral assemblages and major and minor element distributions,  
1046 **International Journal of Earth Science**, 89, 486–495, 2000.
- 1047 [88] Sellén, E., O'Regan, M., Jakobsson, M.: Spatial and temporal Arctic Ocean depositional regimes: a key  
1048 to the evolution of ice drift and current patterns, **Quaternary Science Reviews**, 29, 3644-3664, 2010.
- 1049 [89] Stärz, M., Gong, X., Stein, R., Darby, D.A., Kauker, F., Lohmann, G: Glacial shortcut of Arctic sea-ice  
1050 transport, **Earth and Planetary Science Letters**, 357–358, 257–267, 2012.
- 1051 [90] Stein, R., Grobe, H., Wahsner, M.: Organic carbon, carbonate, and clay mineral distributions in eastern  
1052 central Arctic Ocean surface sediments, **Marine Geology**, 119, 269-285, 1994.
- 1053 [91] Stein R.: Arctic Ocean Sediments: Processes, Proxies, and Paleoenvironment, **Elsevier**, Amsterdam,  
1054 1-592 pp, 2008.
- 1055 [92] Stein, R., Matthiessen, J., Niessen, F.: Re-Coring at Ice Island T3 Site of Key Core FL-224 (Nautilus  
1056 Basin, Amerasian Arctic): Sediment Characteristics and Stratigraphic Framework, **Polarforschung**, 79  
1057 (2), 81 – 96, 2010a.

- 1058 [93] Stein, R., Matthiessen, J., Niessen, F., Krylov, A., Nam, S., Bazhenova, E., Shipboard Geology Group.:  
 1059 Towards a better (litho-) stratigraphy and reconstruction of Quaternary paleoenvironment in the  
 1060 Amerasian Basin (Arctic Ocean), **Polarforschung**, 79 (2), 97–121, 2010b.
- 1061 [94] Stein, R., Fahl, K., Müller J.: Proxy Reconstruction of Cenozoic Arctic Ocean Sea-Ice History– from  
 1062 IRD to IP25, **Polarforschung**, 82 (1), 37–71, 2012.
- 1063 [95] Stokes, C.R., Clark, C.D., Darby, D., Hodgson, D.A.: Late Pleistocene ice export events into the Arctic  
 1064 Ocean from the M'Clure Strait Ice Stream, Canadian Arctic Archipelago, **Global and Planetary Change**,  
 1065 49, 139–162, 2005.
- 1066 [96] Stokes, C.R., Clark, C.D., Storrar, R.: Major changes in ice stream dynamics during deglaciation of the  
 1067 north-western margin of the Laurentide Ice Sheet, **Quaternary Science Reviews**, 28, 721-738, 2009.
- 1068 [97] Svendsen, J. I., Alexanderson, H., Astakhov, V. I., Demidov, I., Dowdeswell, J. A., Funder, S., Gataullin,  
 1069 V., Henriksen, M., Hjort, C., Houmark-Nielsen, M., Hubberten, H. W., Ingólfsson, O., Jakobsson, M.,  
 1070 Kjær, K. H., Larsen, E., Lokrantz, H., Lunkka, J. P., Lyså, A., Mangerud, J., Matiushkov, A., Murray, A.,  
 1071 Möller, P., Niessen, F., Nikolskaya, O., Polyak, L., Saarnisto, M., Siegert, R., Siegert, M. J., Spielhagen,  
 1072 R. F., Stein, R.: Late Quaternary ice sheet history of Northern Eurasia, **Quaternary Science Review**, 23,  
 1073 1229–1271, 2004.
- 1074 [98] Vogt, C.: Regional and temporal variations of mineral assemblages in Arctic Ocean sediments as climatic  
 1075 indicator during glacial/interglacial changes, **Report on Polar Marine Research**, 251, 309, 1997.
- 1076 [99] Vogt, C., Knies, J., Spielhagen, R. F., Stein, R.: Detailed mineralogical evidence for two nearly identical  
 1077 glacial/deglacial cycles and Atlantic water advection to the Arctic Ocean during the last 90,000 years,  
 1078 **Global and Planetary Change**, 31, 23–44, 2001.
- 1079 [100] Vogt, C. and Knies, J.: Sediment dynamics in the Eurasian Arctic Ocean during the last deglaciation —  
 1080 The clay mineral group smectite perspective, **Marine Geology**, 250, 211–222, 2008.
- 1081 [101] Vogt, C. and Knies, J.: Sediment pathways in the western Barents Sea inferred from clay mineral  
 1082 assemblages in surface sediments, **Norwegian Journal of Geology**, 89, 41–55, 2009.
- 1083 [102] Viscosi-Shirley, C., Mammone, K., Pisiak, N., Dymond, J.: Clay mineralogy and multi-element chemistry  
 1084 of surface sediments on the Siberian-Arctic shelf: Implications for sediment provenance and grain size  
 1085 sorting, **Continental Shelf Research**, 23, 1175–1200, 2003.
- 1086 [103] Wahsner, M., Müller, C., Stein, R., Ivanov, G., Levitan, M., Shelekova, E., Tarasov, G.: Clay mineral  
 1087 distributions in surface sediments from the Central Arctic Ocean and the Eurasian continental margin as

1088 indicator for source areas and transport pathways: a synthesis, **Boreas**, 28, 215-233, 1999.

1089 [104] Wang, D. and Hesse, R.: Continental slope sedimentation adjacent to an ice-margin. II. Glaciomarine  
1090 depositional facies on Labrador Slope and glacial cycles, **Marine Geology**, 135, 65-96, 1996.

1091 [105] Wang, R., Xiao, W., März, C., Li, Q.: Late Quaternary paleoenvironmental changes revealed by  
1092 multi-proxy records from the Chukchi Abyssal Plain, western Arctic Ocean, **Global and Planetary**  
1093 **Change**, 108, 100–118, 2013.

1094 [106] Winkler, A., Wolf-Welling, T.C.W., Stattegger, K., Thiede, J.: Clay mineral sedimentation in high  
1095 northern latitude deep-sea basins since the Middle Miocene (ODP Leg 151, NAAG), **International**  
1096 **Journal of Earth Sciences**, 91,133–148, 2002.

1097 [107] Winter, B.L., Johnson, C.M., Clark, D.L.: Strontium, neodymium, and lead isotope variations of  
1098 authigenic and silicate sediment components from the Late Cenozoic Arctic Ocean: implications for  
1099 sediment provenance and the source of trace metals in seawater, **Geochimica et Cosmochimica Acta**, 61,  
1100 4181-4200, 1997.

1101 [108] Xiao, W., Wang, R., Polyak, L., Astakhov, A., Cheng, X.: Stable oxygen and carbon isotopes in  
1102 planktonic foraminifera *Neogloboquadrina pachyderma* in the Arctic Ocean: an overview of published  
1103 and new surface-sediment data, **Marine Geology**, 352, 397-408, 2014.

1104 [109] Xuan, C. and Channell, J.E.T.: Origin of apparent magnetic excursions in deep-sea sediments from  
1105 Mendeleev-Alpha Ridge (Arctic Ocean), **Geochemistry, Geophysics, Geosystems**,11, Q02003, 2010.

1106 [110] Yurco, L. N., Ortiz, J. D., Polyak, L., Darby, D. A., Crawford, K. A.: Clay mineral cycles identified by  
1107 diffuse spectral reflectance in Quaternary sediments from the Northwind Ridge: implications for  
1108 glacial–interglacial sedimentation patterns in the Arctic Ocean, **Polar Research**, 29, 176–197, 2010.

1109 [111] Zou, H.: An X-ray diffraction approach: bulk mineral assemblages as provenance indicator of sediments  
1110 from the Arctic Ocean, PhD Thesis, University of Bremen, Bremen, 1-104 pp, 2016.

1111

1112



1113 **Table 1.** Minerals **Actively Sought** in Diffraction Data Analysis

1114

| <b>Mineral</b> | <b>window(<math>^{\circ}2\theta</math>, CuK<math>\alpha</math> radiation)</b> | <b>Range of D-Spacing(A)</b> | <b>Intensity Factor</b> |
|----------------|-------------------------------------------------------------------------------|------------------------------|-------------------------|
| Amphibole      | 10.30-10.70                                                                   | 8.59- 8.27                   | 2.5                     |
| Augite         | 29.70-30.00                                                                   | 3.00- 2.98                   | 5                       |
| Calcite        | 29.25-29.60                                                                   | 3.04- 3.01                   | 1.65                    |
| Chlorite       | 18.50-19.10                                                                   | 4.79- 4.64                   | 4.95                    |
| Dolomite       | 30.80-31.15                                                                   | 2.90- 2.87                   | 1.53                    |
| K-Feldspar     | 27.35-27.79                                                                   | 3.26- 3.21                   | 4.3                     |
| Quartz         | 26.45-26.95                                                                   | 3.37- 3.31                   | 1                       |

1115

1116

1117 **Table 2.** AMS<sup>14</sup>C datings in core BN05.

1118

| <b>Sample no.</b> | <b>Depth (cm)</b> | <b>AMS 14C age (14C a BP)</b> | <b>Calibrated age median (cal yr BP)</b> | <b>2-σ range (cal yr BP)</b> |
|-------------------|-------------------|-------------------------------|------------------------------------------|------------------------------|
| 112767            | 4-6               | 7810±35                       | 7885                                     | 7797-7958                    |
| 112768            | 8-10              | 8180±35                       | 8259                                     | 8171-8340                    |
| 112769            | 18-20             | 38600±300                     | 41703                                    | 41202-42165                  |
| 115944            | 22-24             | 40800±410                     | 43140                                    | 42522-43901                  |

1119

1120

1121 **Table 3.** Characterization and interpretation of ~~sedimentary variable~~ groups (Fig. 6)

1122

| Group | Leading/ opposite proxies                                                            | Environments                             | Depositional processes | Provenance     |
|-------|--------------------------------------------------------------------------------------|------------------------------------------|------------------------|----------------|
| 1     | <b>Foraminifers, calcite, Mn, clay/</b> <del>coarse grains (esp. silt), quartz</del> | Interglacial (incl. major interstadials) | Sea ice                | Mixed          |
| 2     | <b>Dolomite, Ca, Qua/Fsp /</b> <del>plagioclase, pyroxene, feldspar</del>            | Glacial/ deglacial                       | Icebergs, meltwater    | North American |
| 3     | <b>Feldspar, pyroxene, plagioclase/</b> <del>Ca, dolomite, Qua/Fsp</del>             | Interglacial/ deglacial                  | Sea ice, icebergs      | Siberian       |
| 4     | <b>Smectite, kaolinite, chlorite</b> / <del>clay</del>                               | Glacial/ deglacial                       | Icebergs, debris flows | E Siberian     |
| 5, 6  | <del>Coarse grains (incl. silt)</del>                                                | Glacial/ deglacial                       | Icebergs, debris flows | Mixed          |

1123

1124

1125

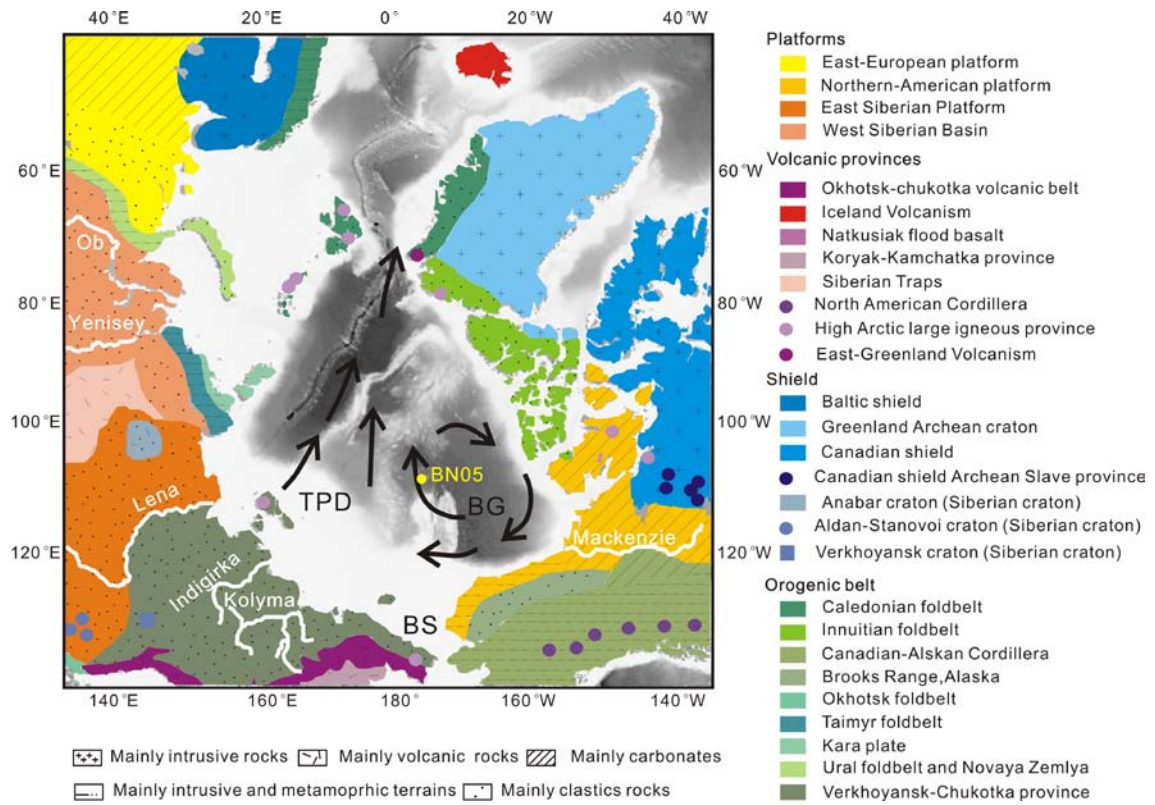

1126

1127

1128 **Figure 1.** Background map showing the location of core ARC4-BN05, the main  
1129 Arctic rivers and the two major surface current systems: Beaufort Gyre (BG) and  
1130 Transpolar Drift (TPD). Schematic geological map shows the distribution and  
1131 prevailing lithology of the main terrains adjacent to the Arctic Ocean (Fagel et al.,  
1132 2014).

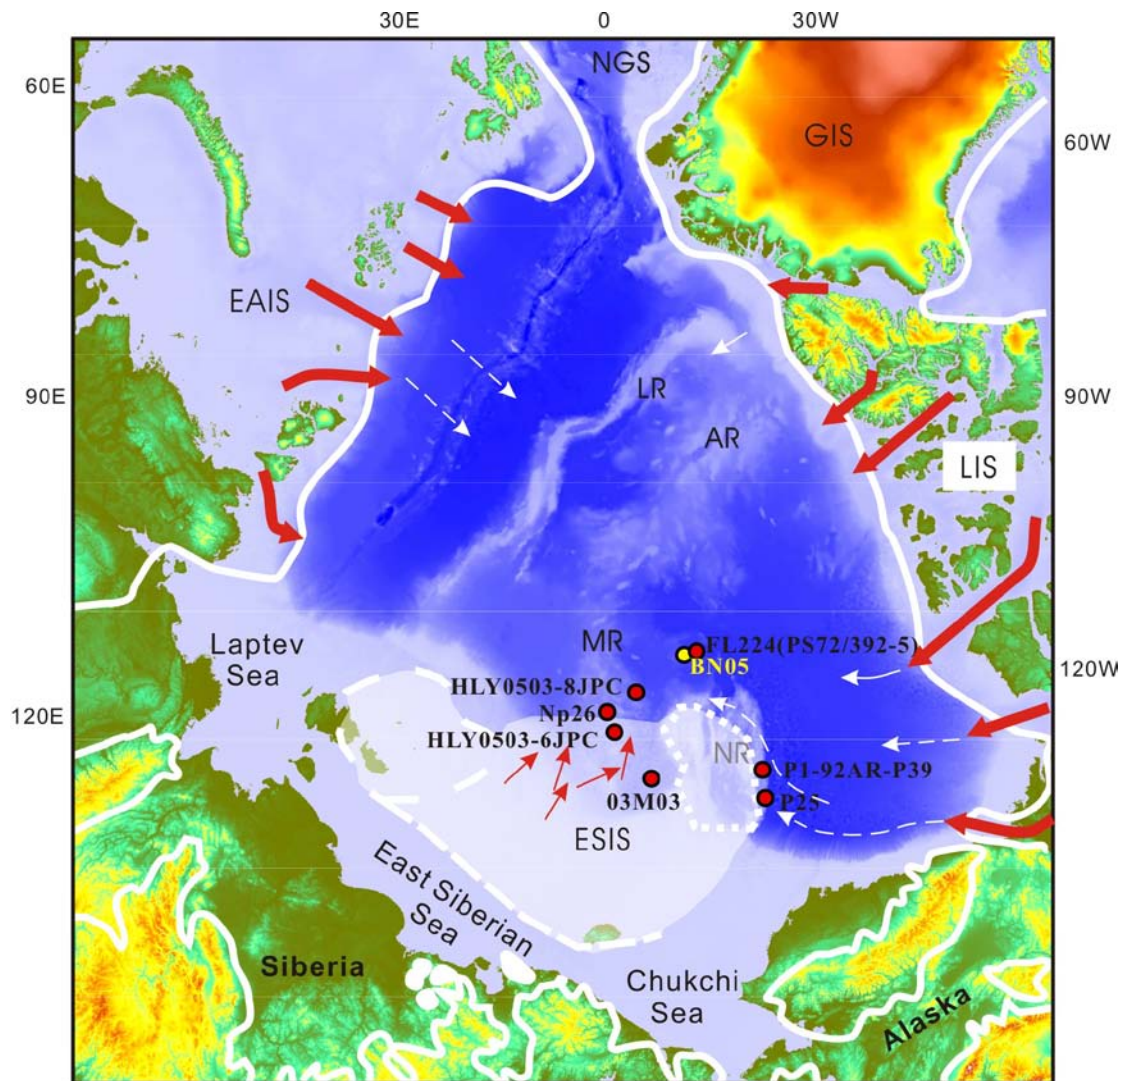

1133

1134 **Figure 2.** Index map showing the location of core ARC4-BN05 (yellow circle) and  
 1135 other cores from previous studies mentioned in this paper (red circles). LR, MR, AR,  
 1136 and NR are Lomonosov, Mendeleev, Alpha, and Northwind ridges, respectively; NGS  
 1137 is Norwegian–Greenland Sea. White lines show maximal Pleistocene limits  
 1138 reconstructed for Greenland, Laurentide, Eurasian, and East Siberian Ice Sheets (GIS,  
 1139 LIS, EAIS and ESIS; [England et al., 2009](#); [Svendsen et al., 2004](#); [Niessen et al., 2013](#)).  
 1140 Proposed flow lines for grounded ice sheets and ice shelves (red and white arrows,  
 1141 respectively) are after [Niessen et al. \(2013\)](#).

1142

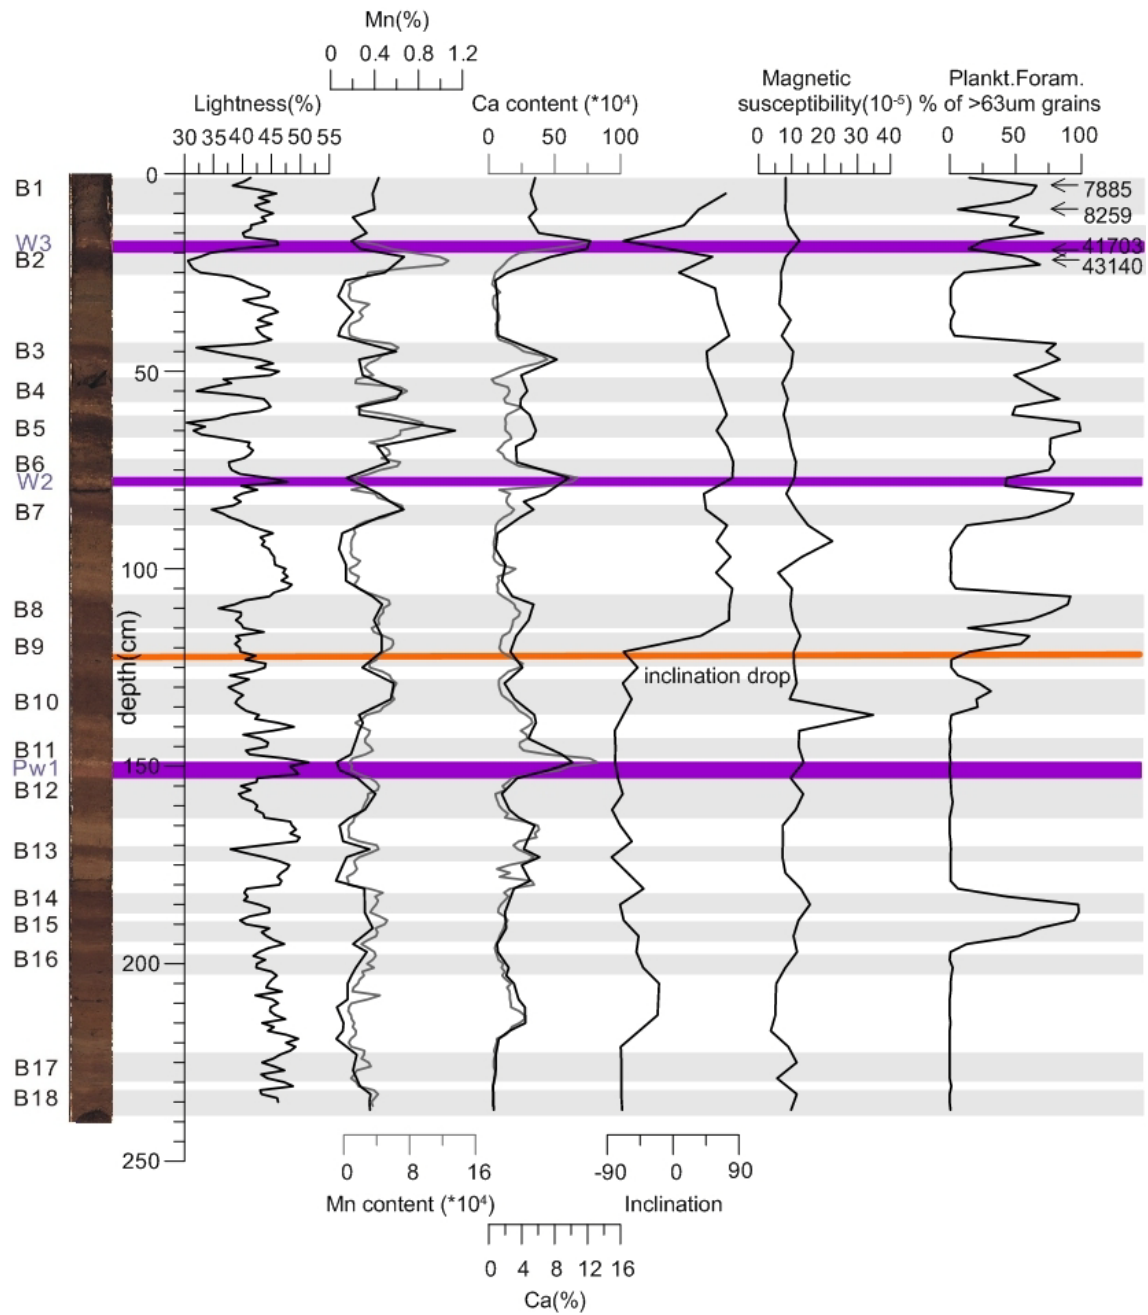

1143

1144 **Figure 3.** Lithostratigraphy and major proxies in core BN05: core photograph with  
 1145 brown layer indices, lightness, **Ca** and Mn content (bulk XRF –grey line, ICP-OES –  
 1146 black line), paleomagnetic inclination, planktic foraminiferal abundance, and AMS<sup>14</sup>C  
 1147 datings. Predominantly dark brown intervals B1-B18 are highlighted in grey; high-Ca,  
 1148 pink-white layers are marked by purple lines. The main inclination drop is marked by  
 1149 orange line. See Table S1 for data used.



1150

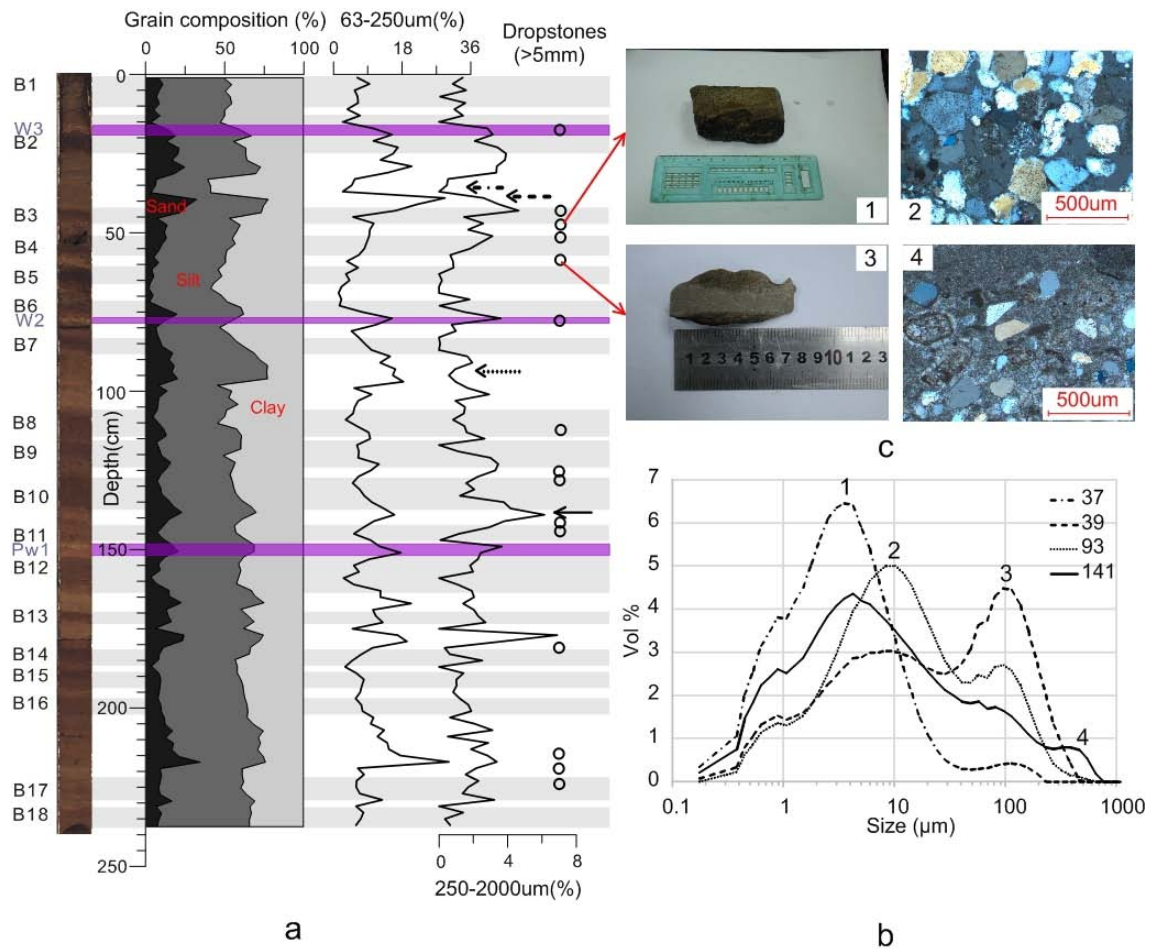

1151

1152 **Figure 4. (a)** Down-core grain-size distribution in core ARC4-BN05: clay (<4 μm),

1153 silt (4-63 μm), sand (63-2000 μm), fine sand (63-250 μm), and coarser sediment

1154 (250-2000μm). Occurrence of dropstones >5 mm is shown by circles on the right. See

1155 Fig. 3 for lithostratigraphy explanation, and Tables S1-2 for data used. (b)

1156 Granulometric distribution types exemplifying major grain-size modes 1-4. Position

1157 of respective curves in core ARC4-BN05 is indicated in the legend (depth in core, cm)

1158 and is shown by arrows in panel a. (c) Examples of dropstones from core

1159 ARC4-BN05. 1, 48-54 cm, quartz sandstone; 2, same dropstone, thin section in cross

1160 polarized light; 3, 56-63.5 cm, dolomite dropstone; 4, same dropstone, thin section in

1161 cross polarized light.

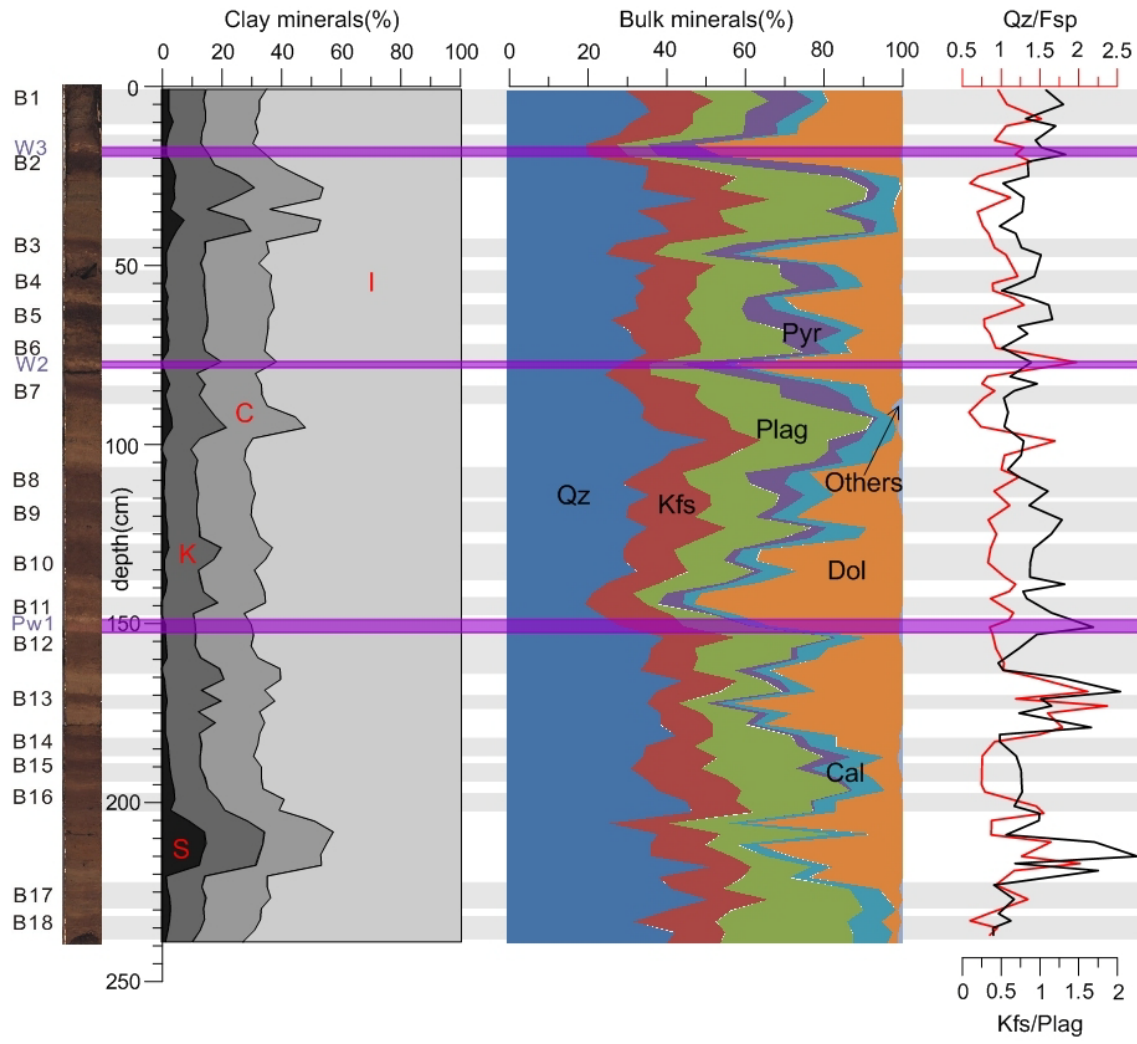

1162

1163 **Figure 5.** Relative weight contents of major clay mineral groups in the clay fraction  
 1164 (<2  $\mu\text{m}$ ), bulk mineral composition and related indices in core ARC4-BN05. S, K, C,  
 1165 and I indicate smectite, kaolinite, chlorite, and illite, respectively. Qz, Kfs, Plag, Pyr,  
 1166 Cal, and Dol are quartz, K-feldspar, plagioclase, pyroxene, calcite, and dolomite,  
 1167 respectively. See Fig. 3 for lithostratigraphy explanation and Table S1 for data used.



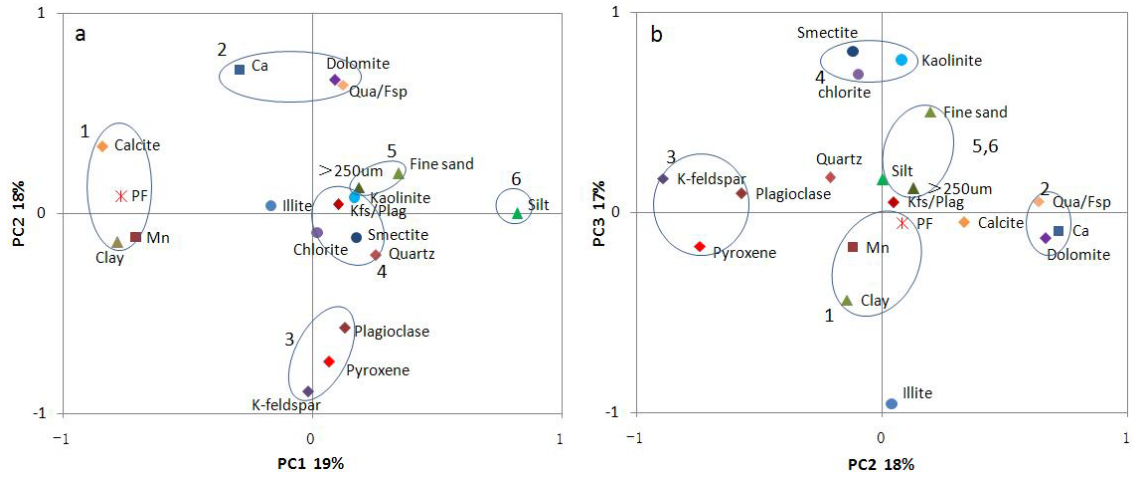

1168

1169 **Figure 6.** Biplots of Principal Component loading scores in PC 1-2 (a) and PC 2-3 (b)

1170 space. Sedimentary variable groups or end members revealed by the loading

1171 distribution are enclosed by ellipses and numbered (see **Table 3** and text in section 5.2

1172 for discussion). See **Tables S3-4** for correlation between variables and PC loading

1173 scores.

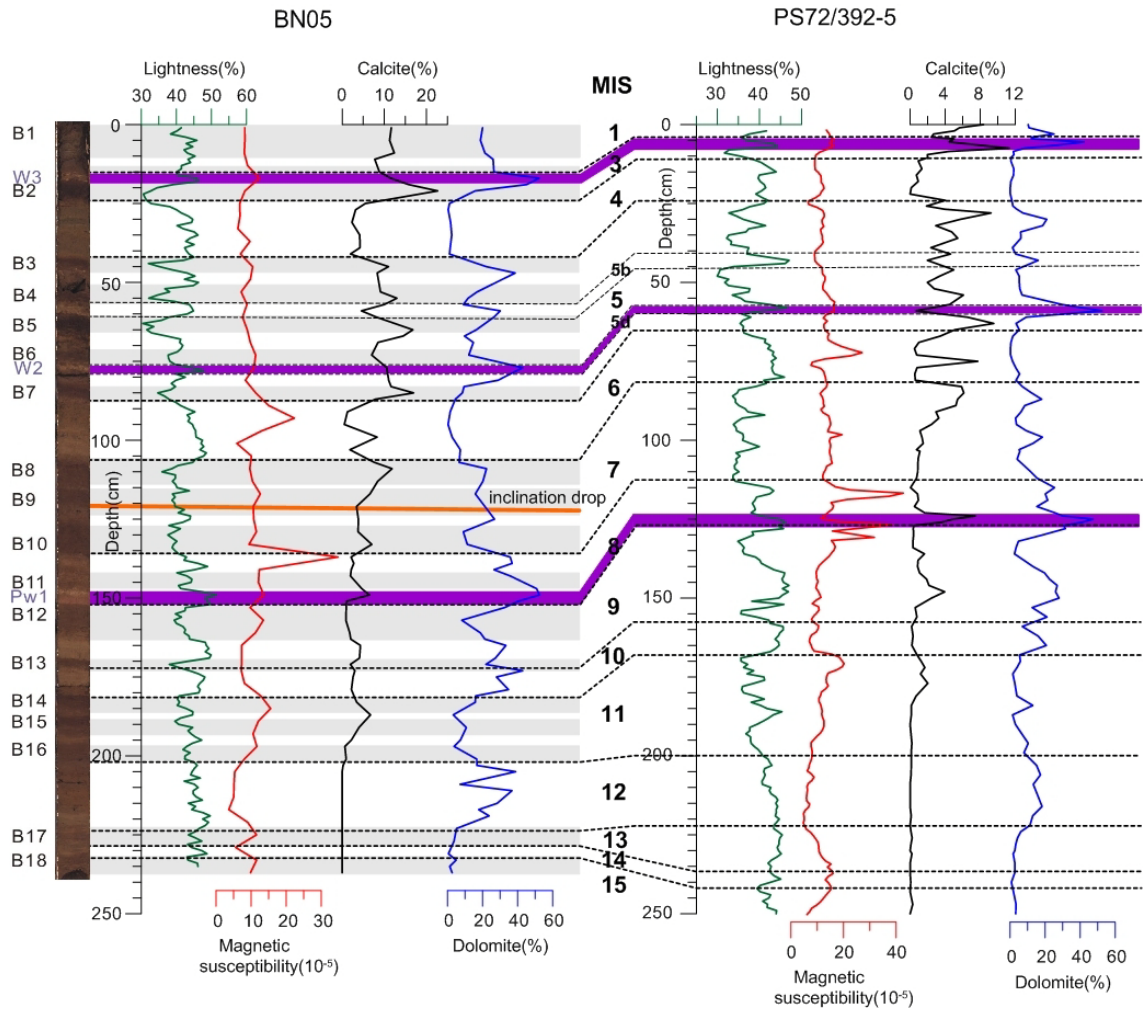

1174

1175 **Fig. 7.** Stratigraphic correlation of core BN05 with PS72/392-5 (Stein et al., 2010a)

1176 based on sediment lightness, magnetic susceptibility, calcite and dolomite content.

1177 See Fig. 3 for lithostratigraphy explanation.

1178

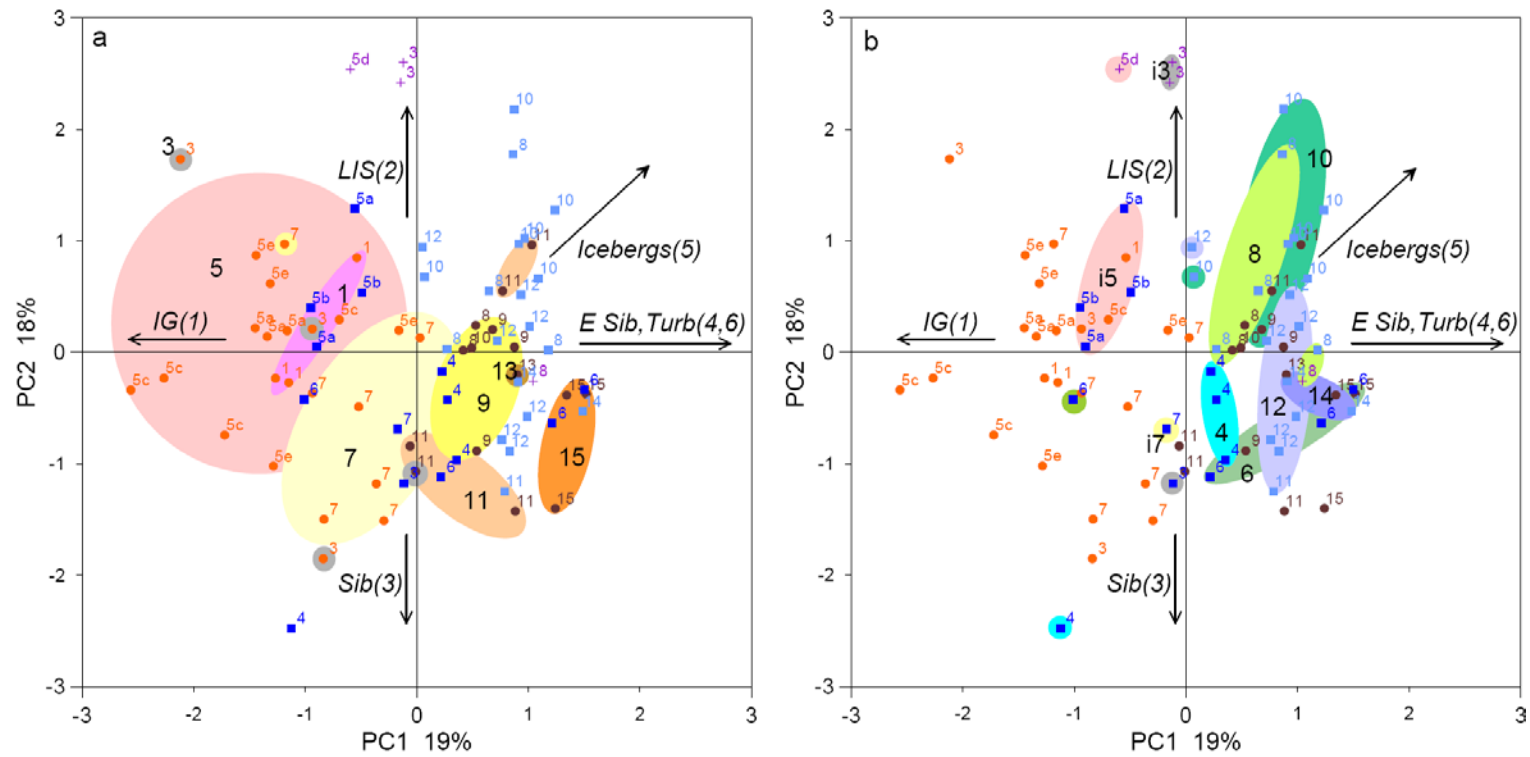

1179

1180 **Figure 8.** Biplots of downcore PC scores in the PC 1-2 space grouped by interglacial (a) and glacial intervals (b). Interpretation of loading score

1181 distribution: IG – interglacial environments, LIS – Laurentide Ice Sheet provenance, Sib/E Sib – Siberian/East Siberian provenance, Turb. –

1182 turbidites; variable **group numbers** shown in parentheses (**Fig. 6; Table 3**; see Section 5.2 above for more discussion). Numbers for individual

1183 and grouped samples show Marine Isotope Stages. See Table S5 for downcore PC score distribution.

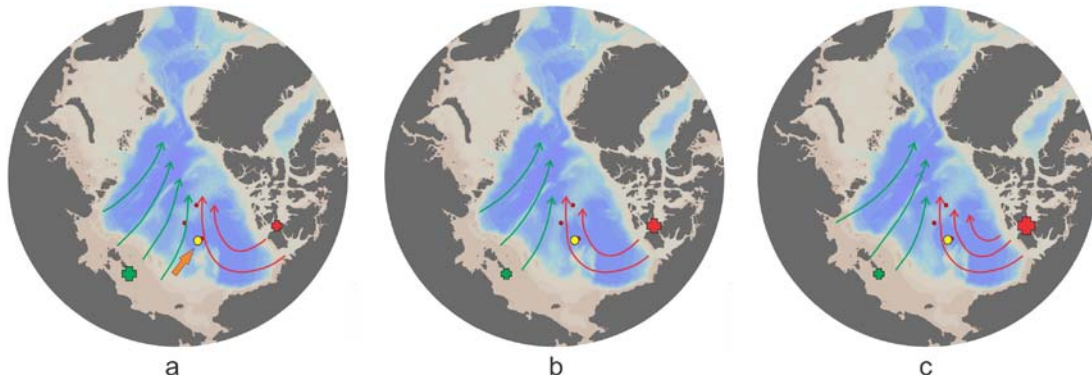

1184

a

b

c

1185 **Figure 9.** Schematic reconstruction of glacial environments in the western Arctic  
 1186 Ocean and factors controlling sedimentation at the BN05 site (yellow circle): surface  
 1187 circulation (red and green arrows), glacioturbidites (orange filled arrow), and  
 1188 ice-sheet size (red and green crosses). See Fig. 1 for modern circulation. (a) High  
 1189 ESIS inputs: MIS 4, 6, 12, and 14; (b) high LIS inputs: MIS 8 and 10; (c) especially  
 1190 high LIS inputs: intra-MIS5 and 3.
